# Supplementary material for: Neuroimaging biomarkers of psychogenic erectile dysfunction: protocol for a systematic review
Source: PubMed Central journal article supplement — BMJ Open. 2019 Aug 26;9(8):e030061. doi: 10.1136/bmjopen-2019-030061 (PMC6720482; doi:10.1136/bmjopen-2019-030061), 2019-08-26
Supplement: bmjopen-2019-030061.draft_revisions.pdf [file bmjopen-2019-030061.draft_revisions.pdf]

# BMJ Open

BMJ Open is committed to open peer review. As part of this commitment we make the peer review history of every article we publish publicly available.

When an article is published we post the peer reviewers' comments and the authors' responses online. We also post the versions of the paper that were used during peer review. These are the versions that the peer review comments apply to.

The versions of the paper that follow are the versions that were submitted during the peer review process. They are not the versions of record or the final published versions. They should not be cited or distributed as the published version of this manuscript.

BMJ Open is an open access journal and the full, final, typeset and author-corrected version of record of the manuscript is available on our site with no access controls, subscription charges or pay-per-view fees (<http://bmjopen.bmj.com>).

If you have any questions on BMJ Open's open peer review process please email [info.bmjopen@bmj.com](mailto:info.bmjopen@bmj.com)

# BMJ Open

## Neuroimaging biomarkers of psychogenic erectile dysfunction: protocol for a systematic review

|                               |                                                                                                                                                                                                                                                                                                                                                                                                                                                                                                                                                                                                                                                                                                                                                                                    |
|-------------------------------|------------------------------------------------------------------------------------------------------------------------------------------------------------------------------------------------------------------------------------------------------------------------------------------------------------------------------------------------------------------------------------------------------------------------------------------------------------------------------------------------------------------------------------------------------------------------------------------------------------------------------------------------------------------------------------------------------------------------------------------------------------------------------------|
| Journal:                      | <i>BMJ Open</i>                                                                                                                                                                                                                                                                                                                                                                                                                                                                                                                                                                                                                                                                                                                                                                    |
| Manuscript ID                 | bmjopen-2019-030061                                                                                                                                                                                                                                                                                                                                                                                                                                                                                                                                                                                                                                                                                                                                                                |
| Article Type:                 | Protocol                                                                                                                                                                                                                                                                                                                                                                                                                                                                                                                                                                                                                                                                                                                                                                           |
| Date Submitted by the Author: | 26-Feb-2019                                                                                                                                                                                                                                                                                                                                                                                                                                                                                                                                                                                                                                                                                                                                                                        |
| Complete List of Authors:     | Yin, Tao; Chengdu University of Traditional Chinese Medicine , Acupuncture and Tuina School/The 3rd Teaching Hospital<br>Li, Zhengjie; Chengdu University of Traditional Chinese Medicine, Acupuncture and Tuina School/The 3rd Teaching Hospital<br>Xiong, Jing; Acupuncture and Tuina School/The 3rd Teaching Hospital, Chengdu University of Traditional Chinese Medicine<br>SUN, RUIRUI; Acupuncture and Tuina School/The 3rd Teaching Hospital, Chengdu University of Traditional Chinese Medicine<br>Lan, L.; Acupuncture and Tuina School/The 3rd Teaching Hospital, Chengdu University of Traditional Chinese Medicine<br>Ren, Feiqiang; Chengdu University of Traditional Chinese Medicine, Zhang, Peihai; Hospital of Chengdu University of Traditional Chinese Medicine |
| Keywords:                     | Erectile dysfunction < UROLOGY, Neuroimaging, Magnetic resonance imaging < RADIOLOGY & IMAGING, Activity likelihood estimation                                                                                                                                                                                                                                                                                                                                                                                                                                                                                                                                                                                                                                                     |
|                               |                                                                                                                                                                                                                                                                                                                                                                                                                                                                                                                                                                                                                                                                                                                                                                                    |

SCHOLARONE™  
Manuscripts

1  
2  
3  
4  
5 **1 Title page**

6  
7  
8 **2 Title**

9  
10 Neuroimaging biomarkers of psychogenic erectile dysfunction: protocol for a  
11 systematic review  
12

13  
14 **5 Authors and Affiliations**

15  
16 Tao Yin<sup>1#</sup>, Zhengjie Li<sup>1,2#</sup>, Jing Xiong<sup>1</sup>, Lei Lan<sup>1,2</sup>, Ruirui Sun<sup>1,2</sup>, Feiqiang Ren<sup>1</sup>,  
17 Peihai Zhang<sup>3\*</sup>  
18

19  
20 <sup>1</sup> Acupuncture and Tuina School/The 3rd Teaching Hospital, Chengdu University of  
21 Traditional Chinese Medicine, Chengdu, Sichuan, China, 610075;  
22

23  
24 <sup>2</sup> Acupuncture-Brain Research Center, Chengdu University of Traditional Chinese  
25 Medicine, Chengdu, Sichuan, China, 610075;  
26

27  
28 <sup>3</sup> Hospital of Chengdu University of Traditional Chinese Medicine, Chengdu,  
29 Sichuan, China, 610072.  
30

31  
32 #Co-first authors: Tao Yin and Zhengjie Li contribute equally to this article.  
33

34  
35 \*Corresponding authors: Peihai Zhang.

36  
37 **Email:** Tao Yin: yintao@stu.cdutcm.edu.cn; Zhengjie Li: lzjbenjamin@163.com;  
38

39  
40 Jing Xiong: 1924634685@qq.com; Ruirui Sun: cpsrr@126.com; Lei Lan:  
41

42  
43 lanleicdutcm281@139.com; Feiqiang Ren: swingsflying@163.com; Peihai Zhang:  
44

45  
46 zhangpeihai@126.com.  
47

48  
49 **20 Correspondences**

50  
51 Peihai Zhang, Hospital of Chengdu University of Traditional Chinese Medicine;  
52

53  
54 Postal address: No. 39 Shi-er-qiao Road, Chengdu, Sichuan Province, P. R. China,  
55

56  
57 610072; Tel: +086 18908173378; E-mail address: zhangpeihai@126.com.  
58  
59  
60



## 1 **Keywords**

2 Erectile dysfunction, Neuroimaging, Magnetic resonance imaging, Activity likelihood  
3 estimation

## 4 **Strengths and limitations of this study**

5 1. This is the first systematic review and meta-analysis which integrate and assess the  
6 central pathological characteristics of pED.

7 2. The qualitative description and quantitative synthesis (activity likelihood estimation  
8 meta-analysis) will be combining used in this study.

9 3. A customized checklist is proposed to evaluate the quality of included studies  
10 according to the purpose of this review.

11 4. This review will not restrict the race and age of participants, which will increase the  
12 heterogeneity of included studies and may increase the risk of bias of the review.

## 13 **INTRODUCTION**

14 Erectile dysfunction (ED) is the most common male sexual disorder which  
15 characterized by the persistent inability to attain or maintain an adequate erection to  
16 obtain satisfactory sexual performance<sup>1</sup>. According to the epidemiological studies,  
17 approximately 37% of males over 70 years old, and 11% of males in 30 years old  
18 suffered from this sexual dysfunction<sup>2</sup>. As a physical and psychosocial illness, ED not  
19 only impair male sexual confidence and satisfaction, but also severely impact the  
20 quality of life (QoL)<sup>3 4</sup> and marital relationship<sup>5</sup> of patients and their female partners.  
21 More importantly, ED has been confirmed as an independent risk factor of  
22 cardiovascular diseases<sup>6 7</sup>. Based on the different causes<sup>8 9</sup>, ED is classified as  
23 psychogenic ED (pED), organic ED such as arteriogenic ED, Neurogenic ED,  
24 venogenic ED, etc. and mixed ED. Different from organic ED which has clear causes  
25 and pathological features, pED is generally caused by some uncertain psychological  
26 factors<sup>10 11</sup> and lack specific biomarkers.

## 27 **Rationale for review**

28 Penile erection is a complex physiological process which modulated by the central

1 nervous system (CNS) and mediated by several neurotransmitters and neuropeptides<sup>12</sup>  
2 <sup>13</sup>. A meta-analysis identified that penile erection was regulated by several cerebral  
3 regions and the activities of insular cortex, claustrum, putamen, and anterior  
4 midcingulate cortex were consistently positively correlated with male penile  
5 erection<sup>14</sup>.

6 With the close relationship between brain and penile erection been widely accepted,  
7 using neuroimaging techniques to explore the central pathological features of ED  
8 attracted many researchers' attention<sup>15-20</sup>. For example, a functional MRI (fMRI)  
9 studies on pED patients' sexual arousal reported that pED patients manifested  
10 deactivation in left superior parietal lobe and prefrontal cortex during  
11 neurobehavioural stimulus<sup>21</sup>. Another resting-state fMRI studies also suggested that  
12 aberrant connection patterns between right anterior insula and right dorsolateral  
13 prefrontal cortex as well as right anterior insula and right temporoparietal might be  
14 the highlighted neuroimaging biomarkers of pED<sup>22</sup>. With structural MRI, researchers  
15 found that compared with healthy controls (HCs), pED sufferers presented grey  
16 matter atrophy in some subcortical structures including amygdala and nucleus  
17 accumbens, and the atrophied degree of left nucleus accumbens have a significant  
18 correlation with low erectile function<sup>23</sup>. Moreover, our previous studies<sup>24</sup> also  
19 determined that pED patients have significant white matter microstructure alterations.  
20 Based on these neuroimaging studies, it could easily conclude that pED was more  
21 than a genitourinary disease, it also has abnormal alterations in both brain structure  
22 and functional activity. However, there were still some inconsistent or even  
23 contradictory results in these studies because of the methodological issues, and the  
24 central pathological alterations associated with pED remain unclear. Therefore,  
25 launching a rigorous systematic review to synthesize the hitherto existing studies is  
26 necessary, it will improve our knowledge of pED's neurological underpinnings and  
27 help to understand the role of CNS in sexual activity.

## 28 **Objectives**

29 The objective of this review is to contribute a comprehensive summary of brain

1 structural and functional alterations in pED patients compared with the HCs.  
2 Furthermore, this review also aims to synthesize the probable correlations between  
3 these altered cerebral regions and the clinical variables.

## 4 **METHODS**

5 This protocol follows the Preferred Reporting Items for Systematic Reviews and  
6 Meta-Analysis Protocols (PRISMA-P) 2015 statement<sup>25</sup> and has been registered with  
7 the PROSPERO International Prospective Register of Systematic Reviews of the  
8 University of York (registration number: CRD42019117206).

### 9 **Eligibility criteria**

10 The inclusion and exclusion criteria of studies will be described with the following  
11 items:

#### 12 *Types of study*

13 The case-control studies, cohort studies, as well as randomized controlled trials will  
14 be included only if the original data of neuroimaging findings could be extracted. The  
15 case reports, narrative or systematic reviews, meta-analyses, letters, and other  
16 second-hand studies will be excluded.

#### 17 *Study design*

18 Neuroimaging studies which centred on the differences in brain structure, brain  
19 functional activity, structural and functional connectivity, etc. between pED patients  
20 and HCs will be included. The longitudinal studies focusing on the management of  
21 pED will also be considered as long as the baseline neuroimaging data was reported.  
22 Both the resting state and task neuroimaging studies will be included, and no  
23 neuroimaging modality will be restricted. Any publication acquired data using  
24 multimodal neuroimaging techniques from the same participants will be collected  
25 separately in this review<sup>26</sup>.

#### 26 *Participants*

27 Participants will be limited at the definite pED patients and the age-matched HCs,  
28 and the minimum sample size is restricted at 12 participants per group according to

1 previous studies<sup>26-28</sup>. The race and age of participants will not be restricted in this  
2 review.

### 3 ***Exposure***

4 pED patients should be diagnosed with comprehensive history taking, physical  
5 examination and even specific examinations according to the diagnostic guidelines  
6 of European Association of Urology (EAU)<sup>29-31</sup>, American Urological Association  
7 (AUA)<sup>32 33</sup> or other authoritative organization<sup>34</sup>. The organic ED or mixed ED  
8 patients, or patients with other andrological or cardiovascular complications will be  
9 excluded. Some studies enrolled participants without clear discrimination of organic  
10 or psychogenic ED will be considered after the comprehensive full-text assessment  
11 or contacting the authors to identify the patients as pED.

### 12 ***Comparators***

13 Containing a parallel HCs group is required for studies to be included in the current  
14 review. Studies must contain HCs who had never been diagnosed with ED before  
15 enrolment and had been reverified with the clinical examinations during researches.  
16 Studies absenting from HCs or contrasting with previous studies will be excluded.

### 17 ***Outcome measures***

18 The primary outcomes of the included studies are the functional and structural  
19 alterations in the brain of the pED patients. The cerebral structure variables include  
20 white matter microstructure, gray matter density and volume, and structural  
21 connectivity. The cerebral function variables include whole-brain and  
22 region-of-interest functional activity, functional connectivity (fMRI based on  
23 blood-oxygen-level-dependent signal or cerebral blood flow), brain molecular  
24 metabolism (PET, Single-Photon Emission Computed Tomography (SPECT)),  
25 neurochemical activity (Magnetic Resonance Spectroscopy (MRS)) as well as brain  
26 electrical activity (Electroencephalogram (EEG)), etc. The secondary outcomes of  
27 these studies contain disease-related scales, QoL scales, emotional scales, and so on.

### 28 ***Report characteristics***

29 The peer-reviewed original studies will be included, the conference proceedings and

1 unpublished theses will be excluded. The publishing time will be restricted up to 1  
2 March 2019 and the language will be restricted at English and Chinese.

### 3 **Search strategy**

4 Electronic searching will be conducted in PubMed, EMBASE, Web of Science, China  
5 Biology Medicine Database (CBM) and China National Knowledge Infrastructure  
6 (CNKI) using the medical subject headings (MeSH) terms. The PubMed (English)  
7 and CNKI (Chinese) searching strategies are displayed in Table 1, and they will be  
8 replicated for other electronic databases. Thereafter, the snowballing searching  
9 strategy will be employed to find other eligible studies according to the reference lists  
10 of enrolled literature. In addition, the WHO International Clinical Trials Registry  
11 Platform will also be searched to mining more potential results.

12 [Insert Table 1 here]

### 13 **Selection process**

14 Covidence (<https://www.covidence.org>), the Cochrane Library recommend online  
15 systematic review management system, will be used to manage literature. The initial  
16 searching results with above strategies will be uploaded to Covidence for the first  
17 step. After duplicates removed, TY will screen the title and abstract to identify  
18 eligible records, JX will also randomly select 15% of records for screening to assess  
19 the inter-rater agreement of the selection criteria. In this review, all the inter-rater  
20 reliability will be assessed by kappa value. Kappa value over 0.75 indicates a high  
21 agreement<sup>35</sup>. After title and abstract screening completed, full-text records will be  
22 uploaded to Covidence for intensive reading. Two reviewers (TY and JX) will  
23 independently complete the full-text review, any disagreement between YT and XJ  
24 will be reconsidered by a third reviewer (ZL). In this stage, eliminated reasons will be  
25 detailed reported for those ineligible records.

26 The selecting process of records will be reported using the PRISMA flow diagram<sup>36</sup>.

### 27 **Data collection**

28 Two independent reviewers (TY and JX) will doubly extract data using a standard

1 data extraction spreadsheet in Excel. Again, any inconsistency between these two  
2 reviewers will also be consulted and judged by ZL, the third reviewer.

3 The following information will be retrieved and extracted from each record.

- 4 ● Publication information: title, first author, publishing time, country/region,  
5 funding supports.
- 6 ● Details of methodology: participants, sample size, diagnostic criteria,  
7 demographic characteristics (including age, handedness, ethnicity, and  
8 education), imaging modalities, data analysis strategies, and clinical outcome  
9 measures.
- 10 ● Results: the significant altered cerebral regions (described with peak  
11 MNI/Talairach coordinate, cluster sizes, and statistical threshold) and the  
12 correlations of imaging data and clinical data.

13 Any missing or question about the above data will be settled by contacting the  
14 author. If no clarification is provided after 4 weeks, the study will still be included in  
15 the final analysis and discussion with the missing information marked.

## 16 **Outcomes and prioritization**

17 The primary outcome of this review is the significant altered cerebral regions in pED  
18 patients compared with HCs. However, due to the variety of analytical measures  
19 employed and great heterogeneity of the statistical thresholds of each study (e.g. voxel  
20 cluster size thresholds, statistic magnitudes, methods of correcting for multiple  
21 comparisons), it is unrealistic to set a uniform significance threshold. Therefore, the  
22 ‘significant’ results will follow the study authors’ own criteria<sup>37</sup>. Some neuroimaging  
23 studies also reported results trending to significance or significant results only before  
24 correction<sup>37</sup>, for a more comprehensive view, these regions will be collected with  
25 special symbols in qualitative synthesis. The secondary outcome is the correlations of  
26 abnormal cerebral regions and clinical variables, which mainly include  
27 symptom-related scales (such as International Index of Erectile Function 5 (IIEF-5)<sup>38</sup>,  
28 Quality of Erection Questionnaire (QEQ)<sup>39</sup>, and the Erection Hardness Score  
29 (EHS))<sup>40</sup>, QoL questionnaire (the Sexual Life Quality Questionnaire (SLQQ))<sup>41</sup> and  
30

1  
2  
3  
4 1 psychological assessment scales (such as Self-Rating Anxiety Scale (SAS)<sup>42</sup>,  
5 2 Self-Rating Depression Scale (SDS)<sup>43</sup>, and Brief Psychiatric Rating Scale (BPRS)<sup>44</sup>).

### 3 **Quality assessment**

4 There are no standardized criteria for quality assessment of neuroimaging studies<sup>45 46</sup>.  
5 Researchers of each study developed their own assessment tools based on some  
6 existing tools (such as QUADAS-2, Newcastle-Ottawa Scale (NOS))<sup>45 47-51</sup>. However,  
7 because of the diverse objects of studies, the currently existing assessment tools are  
8 not very suitable for our review. Therefore, after referring the NOS<sup>52</sup>, some published  
9 systematic reviews<sup>45-47 53</sup> and the Committee on Best Practices in Data Analysis and  
10 Sharing in Neuroimaging Using MRI<sup>54</sup> (<http://www.humanbrainmapping.org>), a  
11 customized checklist is proposed in the current review. This checklist will be used to  
12 evaluate the quality of the enrolled studies from 9 items (Table 2). Each item is scored  
13 as 1 (Yes) or 0 (No or Don't know), and the summation of each item generates an  
14 overall quality score. The quality levels of studies are defined as high (8–9 points),  
15 medium (5–7points) and low (1–4 points).

16 [Insert Table 2 here]

17 Quality assessment will be performed by a professional assessor (LL) and a  
18 non-professional assessor (RS). These two assessors will independently evaluate the  
19 enrolled studies based on the checklist, any discrepancy will also be reconsidered by a  
20 third reviewer (ZL). Again, the inter-rater reliability will be assessed by kappa value.

### 21 **Data Synthesis**

22 Firstly, collected data including publication information, methodology, and the  
23 significant findings of studies will be summarized with a table. And then, a qualitative  
24 review will be performed to synthesize the brain structural and functional alterations  
25 and the correlations between these altered cerebral regions and the clinical variables  
26 in pED patients. If feasible (17 or more studies are included<sup>55</sup>), an activity likelihood  
27 estimation meta-analysis<sup>56 57</sup> will also be launched to quantitatively synthesize the  
28 differences of cerebral structure and function between pED patients and HCs. The

1 subgroup analyses will not be performed in this review. The strength of evidence for  
2 the final conclusion will be determined by the checklist described above.

### 3 **CONCLUSION**

4 Neuroimaging studies have verified the existence of structural and functional  
5 alterations in the brain of pED patients, while the scattered neuroimaging biomarkers  
6 of pED in individual studies have yet been summarized. Therefore, this systematic  
7 review will be launched, aiming to synthesize the central pathological characteristics  
8 of pED for the first time. This work will provide a coherent synthesis of the recent  
9 neuroimaging studies on pED and improve our knowledge of pED's neurological  
10 underpinnings.

### 11 **Patient and public involvement**

12 This is a systematic review protocol; no patients and public were involved.

### 13 **Ethics and dissemination**

14 Ethical approval is not required for this study. This review will be published in a  
15 peer-reviewed journal and presented at conferences.

### 16 **Contributors**

17 Peihai Zhang was responsible for this study. Tao Yin, Zhengjie Li and Peihai Zhang  
18 conceived and designed the study. Tao Yin, Zhengjie Li and Jing Xiong participated  
19 in drafting the trial protocol and preparing the manuscript. Lei Lan, Ruirui Sun and  
20 Feiqiang Ren provided feedback on the study design and protocol. All authors read  
21 and approved the final manuscript.

### 22 **Funding**

23 This work is financially supported by the National Natural Science Foundation of  
24 China (NO.81774137).

### 25 **Competing interests**

26 The authors declare that they have no competing interests.

### 27 **Patient consent**

1  
2  
3  
4 1 Not required.

5  
6 2 **Data sharing statement**

7  
8 3 This paper does not include original data.

9  
10 4 **Reference**

- 11  
12  
13 5 1. Montorsi F, Adaikan G, Becher E, *et al.* Summary of the recommendations on sexual  
14  
15 6 dysfunctions in men. *J Sex Med* 2010;**7**:3572-88. doi: 10.1111/j.1743-6109.2010.02062.x  
16  
17  
18 7 2. Rosen RC, Fisher WA, Eardley I, *et al.* The multinational Men's Attitudes to Life Events and  
19  
20 8 Sexuality (MALES) study: I. Prevalence of erectile dysfunction and related health concerns in  
21  
22 9 the general population. *Curr Med Res Opin* 2004;**20**:607-17. doi:  
23  
24 10 10.1185/030079904125003467  
25  
26  
27 11 3. Li HJ, Bai WJ, Dai YT, *et al.* An analysis of treatment preferences and sexual quality of life  
28  
29 12 outcomes in female partners of Chinese men with erectile dysfunction. *Asian J Androl*  
30  
31 13 2016;**18**:773-9. doi: 10.4103/1008-682x.159719  
32  
33  
34 14 4. Yafi FA, Jenkins L, Albersen M, *et al.* Erectile dysfunction. *Nat Rev Dis Primers*  
35  
36 15 2016;**2**:16003. doi: 10.1038/nrdp.2016.3  
37  
38  
39 16 5. Boddì V, Corona G, Fisher AD, *et al.* "It takes two to tango": the relational domain in a  
40  
41 17 cohort of subjects with erectile dysfunction (ED). *J Sex Med* 2012;**9**:3126-36. doi:  
42  
43 18 10.1111/j.1743-6109.2012.02948.x  
44  
45  
46 19 6. Uddin SMI, Mirbolouk M, Dardari Z, *et al.* Erectile Dysfunction as an Independent Predictor  
47  
48 20 of Future Cardiovascular Events: The Multi-Ethnic Study of Atherosclerosis. *Circulation* 2018  
49  
50 21 doi: 10.1161/circulationaha.118.033990  
51  
52  
53 22 7. Dong JY, Zhang YH, Qin LQ. Erectile dysfunction and risk of cardiovascular disease:  
54  
55  
56  
57  
58  
59  
60

- 1 meta-analysis of prospective cohort studies. *J Am Coll Cardiol* 2011;**58**:1378-85. doi:  
2 10.1016/j.jacc.2011.06.024
- 3 8. Glina S, Cohen DJ, Vieira M. Diagnosis of erectile dysfunction. *Curr Opin Psychiatry*  
4 2014;**27**:394-9. doi: 10.1097/ycp.0000000000000097
- 5 9. Shamloul R, Ghanem H. Erectile dysfunction. *Lancet* 2013;**381**:153-65. doi:  
6 10.1016/s0140-6736(12)60520-0
- 7 10. Rastrelli G, Maggi M. Erectile dysfunction in fit and healthy young men: psychological or  
8 pathological? *Transl Androl Urol* 2017;**6**:79-90. doi: 10.21037/tau.2016.09.06
- 9 11. Papagiannopoulos D, Khare N, Nehra A. Evaluation of young men with organic erectile  
10 dysfunction. *Asian J Androl* 2015;**17**:11-6. doi: 10.4103/1008-682x.139253
- 11 12. Courtois F, Carrier S, Charvier K, *et al.* The control of male sexual responses. *Curr Pharm*  
12 *Des* 2013;**19**:4341-56.
- 13 13. Argiolas A, Rosaria Melis M. Neuromodulation of penile erection: an overview of the role  
14 of neurotransmitters and neuropeptides. *Prog Neurobiol* 1995;**47**:235-55.
- 15 14. Poepl TB, Langguth B, Laird AR, *et al.* The functional neuroanatomy of male  
16 psychosexual and physiosexual arousal: a quantitative meta-analysis. *Hum Brain Mapp*  
17 2014;**35**:1404-21. doi: 10.1002/hbm.22262
- 18 15. Chen J, Chen Y, Gao Q, *et al.* Impaired Prefrontal-Amygdala Pathway, Self-Reported  
19 Emotion, and Erection in Psychogenic Erectile Dysfunction Patients With Normal Nocturnal  
20 Erection. *Front Hum Neurosci* 2018;**12**:157. doi: 10.3389/fnhum.2018.00157
- 21 16. Wu J, He Z, Chen X, *et al.* Altered brain networks in psychogenic erectile dysfunction: a  
22 resting-state fMRI study. *Brain Imaging Behav* 2017;**5**:1073-81. doi:

- 1  
2  
3  
4 1 10.1007/s11682-017-9805-910.1111/andr.12411  
5  
6  
7 2 17. Winder K, Linker RA, Seifert F, *et al.* Insular multiple sclerosis lesions are associated with  
8  
9 3 erectile dysfunction. 2018;**265**:783-92. doi: 10.1007/s00415-018-8763-5  
10  
11  
12 4 18. Jin C, Guan M, Dong M. Aberrant baseline brain activity in psychogenic erectile  
13  
14 5 dysfunction patients: a resting state fMRI study. *J Neurol* 2018;**12**:1393-404. doi:  
15  
16 6 10.1007/s00415-018-8763-510.1007/s11682-017-9805-9  
17  
18  
19 7 19. Chen Y, Chen G, Dai Y, *et al.* Brain structural network topological alterations of the left  
20  
21 8 prefrontal and limbic cortex in psychogenic erectile dysfunction. *Andrology* 2018;**128**:393-403.  
22  
23 9 doi: 10.1111/andr.1241110.1080/00207454.2017.1387116  
24  
25  
26  
27 10 20. Wang T, Liu B, Wu ZJ, *et al.* Hypothalamus may be involved in psychogenic erectile  
28  
29 11 dysfunction. *Zhonghua Nan Ke Xue* 2008;**14**:602-5.  
30  
31  
32 12 21. Cera N, Di Pierro ED, Sepede G, *et al.* The role of left superior parietal lobe in male  
33  
34 13 sexual behavior: dynamics of distinct components revealed by FMRI. *J Sex Med*  
35  
36 14 2012;**9**:1602-12. doi: 10.1111/j.1743-6109.2012.02719.x  
37  
38  
39  
40 15 22. Wang Y, Dong M, Guan M, *et al.* Aberrant Insula-Centered Functional Connectivity in  
41  
42 16 Psychogenic Erectile Dysfunction Patients: A Resting-State fMRI Study. *Front Hum Neurosci*  
43  
44 17 2017;**11**:221. doi: 10.3389/fnhum.2017.00221  
45  
46  
47  
48 18 23. Cera N, Delli Pizzi S, Di Pierro ED, *et al.* Macrostructural alterations of subcortical grey  
49  
50 19 matter in psychogenic erectile dysfunction. *PLoS One* 2012;**7**:e39118. doi:  
51  
52 20 10.1371/journal.pone.0039118  
53  
54  
55  
56 21 24. Zhang P, Liu J, Li G, *et al.* White matter microstructural changes in psychogenic erectile  
57  
58 22 dysfunction patients. *Andrology* 2014;**2**:379-85. doi: 10.1111/j.2047-2927.2014.00191.x  
59  
60

- 1  
2  
3  
4 1 25. Moher D, Shamseer L, Clarke M, *et al*. Preferred reporting items for systematic review  
5  
6 2 and meta-analysis protocols (PRISMA-P) 2015 statement. *Syst Rev* 2015;**4**:1. doi:  
7  
8 3 10.1186/2046-4053-4-1  
9  
10  
11 4 26. Lees B, Mewton L, Stapinski L, *et al*. Binge drinking in young people: protocol for a  
12  
13 5 systematic review of neuropsychological, neurophysiological and neuroimaging studies. *BMJ*  
14  
15 6 *Open* 2018;**8**:e023629. doi: 10.1136/bmjopen-2018-023629  
16  
17  
18 7 27. Ewing SW, Sakhardande A, Blakemore SJ. The effect of alcohol consumption on the  
19  
20 8 adolescent brain: A systematic review of MRI and fMRI studies of alcohol-using youth.  
21  
22 9 *Neuroimage Clin* 2014;**5**:420-37. doi: 10.1016/j.nicl.2014.06.011  
23  
24  
25 10 28. Desmond JE, Glover GH. Estimating sample size in functional MRI (fMRI) neuroimaging  
26  
27 11 studies: statistical power analyses. *J Neurosci Methods* 2002;**118**:115-28.  
28  
29  
30 12 29. Wespes E, Amar E, Hatzichristou D, *et al*. Guidelines on erectile dysfunction. *Eur Urol*  
31  
32 13 2002;**41**:1-5.  
33  
34  
35 14 30. Wespes E, Amar E, Hatzichristou D, *et al*. EAU Guidelines on erectile dysfunction: an  
36  
37 15 update. *Eur Urol* 2006;**49**:806-15. doi: 10.1016/j.eururo.2006.01.028  
38  
39  
40 16 31. Hatzimouratidis K, Amar E, Eardley I, *et al*. Guidelines on male sexual dysfunction:  
41  
42 17 erectile dysfunction and premature ejaculation. *Eur Urol* 2010;**57**:804-14. doi:  
43  
44 18 10.1016/j.eururo.2010.02.020  
45  
46  
47 19 32. Montague DK, Jarow JP, Broderick GA, *et al*. Chapter 1: The management of erectile  
48  
49 20 dysfunction: an AUA update. *J Urol* 2005;**174**:230-9. doi:  
50  
51 21 10.1097/01.ju.0000164463.19239.19  
52  
53  
54 22 33. Burnett AL, Nehra A, Breau RH, *et al*. Erectile Dysfunction: AUA Guideline. *J Urol*  
55  
56  
57  
58  
59  
60

- 1  
2  
3  
4 1 2018;**200**:633-41. doi: 10.1016/j.juro.2018.05.004  
5  
6  
7 2 34. Ryu JK, Cho KS, Kim SJ, *et al.* Korean Society for Sexual Medicine and Andrology  
8  
9 3 (KSSMA) Guideline on Erectile Dysfunction. *World J Mens Health* 2013;**31**:83-102. doi:  
10  
11 4 10.5534/wjmh.2013.31.2.83  
12  
13  
14 5 35. McHugh ML. Interrater reliability: the kappa statistic. *Biochem Med (Zagreb)*  
15  
16 6 2012;**22**:276-82.  
17  
18  
19 7 36. Moher D, Liberati A, Tetzlaff J, *et al.* Preferred reporting items for systematic reviews and  
20  
21 8 meta-analyses: the PRISMA statement. *PLoS Med* 2009;**6**:e1000097. doi:  
22  
23 9 10.1371/journal.pmed.1000097  
24  
25  
26  
27 10 37. Fox KC, Nijeboer S, Dixon ML, *et al.* Is meditation associated with altered brain structure?  
28  
29 11 A systematic review and meta-analysis of morphometric neuroimaging in meditation  
30  
31 12 practitioners. *Neurosci Biobehav Rev* 2014;**43**:48-73. doi: 10.1016/j.neubiorev.2014.03.016  
32  
33  
34  
35 13 38. Rosen RC, Riley A, Wagner G, *et al.* The international index of erectile function (IIEF): a  
36  
37 14 multidimensional scale for assessment of erectile dysfunction. *Urology* 1997;**49**:822-30.  
38  
39  
40 15 39. Porst H, Gilbert C, Collins S, *et al.* Development and validation of the quality of erection  
41  
42 16 questionnaire. *J Sex Med* 2007;**4**:372-81. doi: 10.1111/j.1743-6109.2006.00422.x  
43  
44  
45 17 40. Mulhall JP, Goldstein I, Bushmakin AG, *et al.* Validation of the erection hardness score. *J*  
46  
47 18 *Sex Med* 2007;**4**:1626-34. doi: 10.1111/j.1743-6109.2007.00600.x  
48  
49  
50  
51 19 41. Woodward JM, Hass SL, Woodward PJ. Reliability and validity of the sexual life quality  
52  
53 20 questionnaire (SLQQ). *Qual Life Res* 2002;**11**:365-77.  
54  
55  
56 21 42. Zung WW. A rating instrument for anxiety disorders. *Psychosomatics* 1971;**12**:371-9. doi:  
57  
58 22 10.1016/s0033-3182(71)71479-0  
59  
60

- 1  
2  
3  
4 1 43. Zung WW. A SELF-RATING DEPRESSION SCALE. *Arch Gen Psychiatry* 1965;**12**:63-70.  
5  
6  
7 2 44. Overall JE, Gorham DR. The Brief Psychiatric Rating Scale. *Psychological Reports*  
8  
9 3 1962;**10**:799-812. doi: 10.2466/pr0.1962.10.3.799  
10  
11  
12 4 45. Soiza RL, Sharma V, Ferguson K, *et al*. Neuroimaging studies of delirium: a systematic  
13  
14 5 review. *J Psychosom Res* 2008;**65**:239-48. doi: 10.1016/j.jpsychores.2008.05.021  
15  
16  
17 6 46. Haggstrom L, Welschinger R, Caplan GA. Functional neuroimaging offers insights into  
18  
19 7 delirium pathophysiology: A systematic review. *Australasian Journal on Ageing*  
20  
21 8 2017;**36**:186-92. doi: doi: 10.1111/ajag.12417.  
22  
23  
24  
25 9 47. Lavagnino L, Arnone D, Cao B, *et al*. Inhibitory control in obesity and binge eating  
26  
27 10 disorder: A systematic review and meta-analysis of neurocognitive and neuroimaging studies.  
28  
29 11 *Neurosci Biobehav Rev* 2016;**68**:714-26. doi: 10.1016/j.neubiorev.2016.06.041  
30  
31  
32 12 48. Sumner PJ, Bell IH, Rossell SL. A systematic review of task-based functional  
33  
34 13 neuroimaging studies investigating language, semantic and executive processes in thought  
35  
36 14 disorder. *Neurosci Biobehav Rev* 2018;**94**:59-75. doi: 10.1016/j.neubiorev.2018.08.005  
37  
38  
39  
40 15 49. McCrea M, Meier T, Huber D, *et al*. Role of advanced neuroimaging, fluid biomarkers and  
41  
42 16 genetic testing in the assessment of sport-related concussion: a systematic review. *Br J*  
43  
44 17 *Sports Med* 2017;**51**:919-29. doi: 10.1136/bjsports-2016-097447  
45  
46  
47  
48 18 50. Ailion AS, Hortman K, King TZ. Childhood Brain Tumors: a Systematic Review of the  
49  
50 19 Structural Neuroimaging Literature. *Neuropsychol Rev* 2017;**27**:220-44. doi:  
51  
52 20 10.1007/s11065-017-9352-6  
53  
54  
55  
56 21 51. Cagnie B, Coppieters I, Denecker S, *et al*. Central sensitization in fibromyalgia? A  
57  
58 22 systematic review on structural and functional brain MRI. *Semin Arthritis Rheum*  
59  
60

- 1  
2  
3  
4 1 2014;**44**:68-75. doi: 10.1016/j.semarthrit.2014.01.001  
5  
6  
7 2 52. Wells GA, Shea B, O'Connell D, *et al.* The Newcastle-Ottawa Scale (NOS) for assessing  
8  
9 3 the quality of nonrandomised studies in meta-analyses. Secondary The Newcastle-Ottawa  
10  
11 4 Scale (NOS) for assessing the quality of nonrandomised studies in meta-analyses 2013.  
12  
13  
14 5 [http://www.ohri.ca/programs/clinical\\_epidemiology/oxford.asp](http://www.ohri.ca/programs/clinical_epidemiology/oxford.asp).  
15  
16  
17 6 53. Wilson PH, Smits-Engelsman B, Caeyenberghs K, *et al.* Cognitive and neuroimaging  
18  
19 7 findings in developmental coordination disorder: new insights from a systematic review of  
20  
21 8 recent research. *Dev Med Child Neurol* 2017;**59**:1117-29. doi: 10.1111/dmcn.13530  
22  
23  
24 9 54. Nichols TE, Das S, Eickhoff SB, *et al.* Best practices in data analysis and sharing in  
25  
26 10 neuroimaging using MRI. *Nature neuroscience* 2017;**20**:299-303. doi: 10.1038/nn.4500  
27  
28  
29 11 55. Eickhoff SB, Nichols TE, Laird AR, *et al.* Behavior, sensitivity, and power of activation  
30  
31 12 likelihood estimation characterized by massive empirical simulation. *Neuroimage*  
32  
33 13 2016;**137**:70-85. doi: 10.1016/j.neuroimage.2016.04.072  
34  
35  
36 14 56. Eickhoff SB, Laird AR, Grefkes C, *et al.* Coordinate-based activation likelihood estimation  
37  
38 15 meta-analysis of neuroimaging data: a random-effects approach based on empirical  
39  
40 16 estimates of spatial uncertainty. *Hum Brain Mapp* 2009;**30**:2907-26. doi: 10.1002/hbm.20718  
41  
42  
43 17 57. Turkeltaub PE, Eden GF, Jones KM, *et al.* Meta-analysis of the functional neuroanatomy  
44  
45 18 of single-word reading: method and validation. *Neuroimage* 2002;**16**:765-80.  
46  
47  
48  
49  
50  
51  
52  
53  
54  
55  
56  
57  
58  
59  
60

1 Table 1: Searching items for identifying articles in PubMed (English) and CNKI (Chinese).

| PubMed searching strategy                                                                                                                    | CNKI searching strategy                                       |
|----------------------------------------------------------------------------------------------------------------------------------------------|---------------------------------------------------------------|
| #1 Erectile Dysfunction [MeSH Terms]                                                                                                         | #1 [ ]                                                        |
| #2 Impoten* [All Fields]                                                                                                                     | #2 [ ]                                                        |
| #3 Erectile disturbance [All Fields]                                                                                                         | #3 [ ]                                                        |
| #4 Erectile disorder [All Fields]                                                                                                            | #4 ED [ ]                                                     |
| #5 Sexual Dysfunction [MeSH Terms]                                                                                                           | #5 #1 OR #2 OR#3 OR #4                                        |
| #6 Asynodia [All Fields]                                                                                                                     | #6 [ ]                                                        |
| #7 Erection failure [All Fields]                                                                                                             | #7 [ ]                                                        |
| #8 Penile Erection [MeSH Terms]                                                                                                              | #8 [ ]                                                        |
| #9 #1 OR #2 OR#3 OR #4 OR #5 OR #6 OR #7<br>OR #8                                                                                            | #9 MRI [ ]<br>#10 PET [ ]                                     |
| #10 Neuroimaging [MeSH Terms]                                                                                                                | #11 SPECT [ ]                                                 |
| #11 Functional Neuroimaging [MeSH Terms]                                                                                                     | #12 EEG [ ]                                                   |
| #12 Brain imaging [All Fields]                                                                                                               | #13 MRS [ ]                                                   |
| #13 Magnetic resonance imaging [MeSH Terms]                                                                                                  | #14 DTI [ ]                                                   |
| #14 Magnetic resonance* [MeSH Terms]                                                                                                         | #15 #6 OR #7 OR #8 OR #9 OR #10<br>OR#11 OR #12 OR #13 OR #14 |
| #15 MRI [All Fields]                                                                                                                         |                                                               |
| #16 Tomography [MeSH Terms]                                                                                                                  | <b>#16 Final search terms: #5 AND #15</b>                     |
| #17 Positron Emission Tomography [MeSH<br>Terms]                                                                                             |                                                               |
| #18 Tomography, Emission-Computed,<br>Single-Photon [MeSH Terms]                                                                             |                                                               |
| #19 PET [All Fields]                                                                                                                         |                                                               |
| #20 PET-CT [All Fields]                                                                                                                      |                                                               |
| #21 Single Photon Emission Computed<br>Tomography [MeSH Terms]                                                                               |                                                               |
| #22 SPECT[All Fields]                                                                                                                        |                                                               |
| #23 Electroencephalography [MeSH Terms]                                                                                                      |                                                               |
| #24 EEG [All Fields]                                                                                                                         |                                                               |
| #25 Magnetic Resonance Spectroscopy [MeSH<br>Terms]                                                                                          |                                                               |
| #26 MRS [All Fields]                                                                                                                         |                                                               |
| #27 Diffusion Tensor Imaging [MeSH Terms]                                                                                                    |                                                               |
| #28 DTI [All Fields]                                                                                                                         |                                                               |
| #29 #9 OR #10 OR#11 OR #12 OR #13 OR #14<br>OR #15 OR #16 OR #17 OR #18 OR #19 OR #20<br>OR #21 OR #22 OR #23 OR #24 OR #25 OR #26<br>OR #27 |                                                               |
| <b>#30 Final search terms: #9 AND #29</b>                                                                                                    |                                                               |

2

3

1 Table 2. The checklist of quality assessment.

| Quality assessment categories                                                                                                           | yes | No | Don't know |
|-----------------------------------------------------------------------------------------------------------------------------------------|-----|----|------------|
| 1. The study addressed an explicit question (theory-driven).                                                                            |     |    |            |
| 2. With sufficient sample size or used justified power calculation.                                                                     |     |    |            |
| 3. With clearly inclusion criteria and exclusion criteria of participants.                                                              |     |    |            |
| 4. Controlled the important confounding factors such as age, handedness, and education of participants.                                 |     |    |            |
| 5. With adequate quality control during data acquisition.                                                                               |     |    |            |
| 6. Described the response rate in detail.                                                                                               |     |    |            |
| 7. Assessed outcomes with blinded or third-party assessors.                                                                             |     |    |            |
| 8. Used appropriate multiple testing correction in statistical modelling and inference.                                                 |     |    |            |
| 9. Reported detailed imaging results including MNI/Talairach coordinate, statistic magnitudes cluster sizes, and statistical threshold. |     |    |            |

2

**PRISMA-P (Preferred Reporting Items for Systematic review and Meta-Analysis Protocols) 2015 checklist: recommended items to address in a systematic review protocol\***

| Section and topic                 | Item No | Checklist item                                                                                                                                                                                  |                  |
|-----------------------------------|---------|-------------------------------------------------------------------------------------------------------------------------------------------------------------------------------------------------|------------------|
| <b>ADMINISTRATIVE INFORMATION</b> |         |                                                                                                                                                                                                 |                  |
| Title:                            |         |                                                                                                                                                                                                 |                  |
| Identification                    | 1a      | Identify the report as a protocol of a systematic review                                                                                                                                        | Line 3, Page 1   |
| Update                            | 1b      | If the protocol is for an update of a previous systematic review, identify as such                                                                                                              |                  |
| Registration                      | 2       | If registered, provide the name of the registry (such as PROSPERO) and registration number                                                                                                      | Line 27, Page 2  |
| Authors:                          |         |                                                                                                                                                                                                 |                  |
| Contact                           | 3a      | Provide name, institutional affiliation, e-mail address of all protocol authors; provide physical mailing address of corresponding author                                                       | Page 1           |
| Contributions                     | 3b      | Describe contributions of protocol authors and identify the guarantor of the review                                                                                                             | Line 15, Page 10 |
| Amendments                        | 4       | If the protocol represents an amendment of a previously completed or published protocol, identify as such and list changes; otherwise, state plan for documenting important protocol amendments | Not applicable   |
| Support:                          |         |                                                                                                                                                                                                 |                  |
| Sources                           | 5a      | Indicate sources of financial or other support for the review                                                                                                                                   | Line 21, Page 10 |
| Sponsor                           | 5b      | Provide name for the review funder and/or sponsor                                                                                                                                               | Line 21, Page 10 |
| Role of sponsor or funder         | 5c      | Describe roles of funder(s), sponsor(s), and/or institution(s), if any, in developing the protocol                                                                                              | Line 21, Page 10 |
| <b>INTRODUCTION</b>               |         |                                                                                                                                                                                                 |                  |
| Rationale                         | 6       | Describe the rationale for the review in the context of what is already known                                                                                                                   | Line 27, Page 3  |
| Objectives                        | 7       | Provide an explicit statement of the question(s) the review will address with reference to participants, interventions, comparators, and outcomes (PICO)                                        | Line 28, Page 4  |
| <b>METHODS</b>                    |         |                                                                                                                                                                                                 |                  |
| Eligibility criteria              | 8       | Specify the study characteristics (such as PICO, study design, setting, time frame) and report                                                                                                  | Line 9, Page 5   |

|                                    |     |                                                                                                                                                                                                                                                  |                  |
|------------------------------------|-----|--------------------------------------------------------------------------------------------------------------------------------------------------------------------------------------------------------------------------------------------------|------------------|
|                                    |     | characteristics (such as years considered, language, publication status) to be used as criteria for eligibility for the review                                                                                                                   |                  |
| Information sources                | 9   | Describe all intended information sources (such as electronic databases, contact with study authors, trial registers or other grey literature sources) with planned dates of coverage                                                            | Line 4, Page 7   |
| Search strategy                    | 10  | Present draft of search strategy to be used for at least one electronic database, including planned limits, such that it could be repeated                                                                                                       | Table 1, Page 15 |
| Study records:                     |     |                                                                                                                                                                                                                                                  |                  |
| Data management                    | 11a | Describe the mechanism(s) that will be used to manage records and data throughout the review                                                                                                                                                     | Line 14, Page 7  |
| Selection process                  | 11b | State the process that will be used for selecting studies (such as two independent reviewers) through each phase of the review (that is, screening, eligibility and inclusion in meta-analysis)                                                  | Line 13, Page 7  |
| Data collection process            | 11c | Describe planned method of extracting data from reports (such as piloting forms, done independently, in duplicate), any processes for obtaining and confirming data from investigators                                                           | Line 27, Page 7  |
| Data items                         | 12  | List and define all variables for which data will be sought (such as PICO items, funding sources), any pre-planned data assumptions and simplifications                                                                                          | Line 3, Page 8   |
| Outcomes and prioritization        | 13  | List and define all outcomes for which data will be sought, including prioritization of main and additional outcomes, with rationale                                                                                                             | Line 16, Page 8  |
| Risk of bias in individual studies | 14  | Describe anticipated methods for assessing risk of bias of individual studies, including whether this will be done at the outcome or study level, or both; state how this information will be used in data synthesis                             | Not applicable   |
| Data synthesis                     | 15a | Describe criteria under which study data will be quantitatively synthesised                                                                                                                                                                      | Line 26, Page 9  |
|                                    | 15b | If data are appropriate for quantitative synthesis, describe planned summary measures, methods of handling data and methods of combining data from studies, including any planned exploration of consistency (such as $I^2$ , Kendall's $\tau$ ) | Line 26, Page 9  |
|                                    | 15c | Describe any proposed additional analyses (such as sensitivity or subgroup analyses, meta-regression)                                                                                                                                            | Line 28, Page 9  |
|                                    | 15d | If quantitative synthesis is not appropriate, describe the type of summary planned                                                                                                                                                               | Line 22, Page 9  |
| Meta-bias(es)                      | 16  | Specify any planned assessment of meta-bias(es) (such as publication bias across studies, selective                                                                                                                                              | Not applicable   |

---

reporting within studies)

---

Confidence in cumulative  
evidence

17

Describe how the strength of the body of evidence will be assessed (such as GRADE)

Line 3, Page 9

---

**\* It is strongly recommended that this checklist be read in conjunction with the PRISMA-P Explanation and Elaboration (cite when available) for important clarification on the items. Amendments to a review protocol should be tracked and dated. The copyright for PRISMA-P (including checklist) is held by the PRISMA-P Group and is distributed under a Creative Commons Attribution Licence 4.0.**

*From: Shamseer L, Moher D, Clarke M, Ghersi D, Liberati A, Petticrew M, Shekelle P, Stewart L, PRISMA-P Group. Preferred reporting items for systematic review and meta-analysis protocols (PRISMA-P) 2015: elaboration and explanation. BMJ. 2015 Jan 2;349(jan02 1):g7647.*

# BMJ Open

## Neuroimaging biomarkers of psychogenic erectile dysfunction: protocol for a systematic review

|                                 |                                                                                                                                                                                                                                                                                                                                                                                                                                                                                                                                                                                                                                                                                                                                                                                    |
|---------------------------------|------------------------------------------------------------------------------------------------------------------------------------------------------------------------------------------------------------------------------------------------------------------------------------------------------------------------------------------------------------------------------------------------------------------------------------------------------------------------------------------------------------------------------------------------------------------------------------------------------------------------------------------------------------------------------------------------------------------------------------------------------------------------------------|
| Journal:                        | <i>BMJ Open</i>                                                                                                                                                                                                                                                                                                                                                                                                                                                                                                                                                                                                                                                                                                                                                                    |
| Manuscript ID                   | bmjopen-2019-030061.R1                                                                                                                                                                                                                                                                                                                                                                                                                                                                                                                                                                                                                                                                                                                                                             |
| Article Type:                   | Protocol                                                                                                                                                                                                                                                                                                                                                                                                                                                                                                                                                                                                                                                                                                                                                                           |
| Date Submitted by the Author:   | 03-Jul-2019                                                                                                                                                                                                                                                                                                                                                                                                                                                                                                                                                                                                                                                                                                                                                                        |
| Complete List of Authors:       | Yin, Tao; Chengdu University of Traditional Chinese Medicine , Acupuncture and Tuina School/The 3rd Teaching Hospital<br>Li, Zhengjie; Chengdu University of Traditional Chinese Medicine, Acupuncture and Tuina School/The 3rd Teaching Hospital<br>Xiong, Jing; Acupuncture and Tuina School/The 3rd Teaching Hospital, Chengdu University of Traditional Chinese Medicine<br>Lan, L.; Acupuncture and Tuina School/The 3rd Teaching Hospital, Chengdu University of Traditional Chinese Medicine<br>SUN, RUIRUI; Acupuncture and Tuina School/The 3rd Teaching Hospital, Chengdu University of Traditional Chinese Medicine<br>Ren, Feiqiang; Chengdu University of Traditional Chinese Medicine, Zhang, Peihai; Hospital of Chengdu University of Traditional Chinese Medicine |
| <b>Primary Subject Heading</b>: | Sexual health                                                                                                                                                                                                                                                                                                                                                                                                                                                                                                                                                                                                                                                                                                                                                                      |
| Secondary Subject Heading:      | Urology                                                                                                                                                                                                                                                                                                                                                                                                                                                                                                                                                                                                                                                                                                                                                                            |
| Keywords:                       | Neuroimaging, Magnetic resonance imaging < RADIOLOGY & IMAGING, Activity likelihood estimation, Psychogenic erectile dysfunction                                                                                                                                                                                                                                                                                                                                                                                                                                                                                                                                                                                                                                                   |
|                                 |                                                                                                                                                                                                                                                                                                                                                                                                                                                                                                                                                                                                                                                                                                                                                                                    |

SCHOLARONE™  
Manuscripts

1  
2  
3  
4  
5 **1 Title page**

6  
7  
8 **2 Title**

9  
10 Neuroimaging biomarkers of psychogenic erectile dysfunction: protocol for a  
11 systematic review  
12

13  
14 **5 Authors and Affiliations**

15  
16 Tao Yin<sup>1#</sup>, Zhengjie Li<sup>1,2#</sup>, Jing Xiong<sup>1</sup>, Lei Lan<sup>1,2</sup>, Ruirui Sun<sup>1,2</sup>, Feiqiang Ren<sup>1</sup>, Peihai  
17 Zhang<sup>3\*</sup>  
18

19  
20 <sup>1</sup> Acupuncture and Tuina School /The 3rd Teaching Hospital, Chengdu University of  
21 Traditional Chinese Medicine, Chengdu, Sichuan, China, 610075;  
22

23  
24 <sup>2</sup> Acupuncture-Brain Research Centre, Chengdu University of Traditional Chinese  
25 Medicine, Chengdu, Sichuan, China, 610075;  
26

27  
28 <sup>3</sup> Hospital of Chengdu University of Traditional Chinese Medicine, Chengdu, Sichuan,  
29 China, 610072.  
30

31  
32 #Co-first authors: Tao Yin and Zhengjie Li contributed equally to this article.  
33

34  
35 \*Corresponding authors: Peihai Zhang.

36  
37 **Email:** Tao Yin: yintao@stu.cdutcm.edu.cn; Zhengjie Li: lzjbenjamin@163.com; Jing  
38

39 Xiong: 1924634685@qq.com; Ruirui Sun: cpsrr@126.com; Lei Lan:  
40

41 lanleicdutcm281@139.com; Feiqiang Ren: swingsflying@163.com; Peihai Zhang:  
42

43 zhangpeihai@126.com.  
44  
45

46  
47 **20 Correspondences**

48  
49 Peihai Zhang, Hospital of Chengdu University of Traditional Chinese Medicine; Postal  
50 address: No. 39 Shi-er-qiao Road, Chengdu, Sichuan Province, P. R. China, 610072;  
51

52  
53 Tel: +086 18908173378; E-mail address: zhangpeihai@126.com.  
54  
55  
56  
57  
58  
59  
60



1  
2  
3  
4 **1 PROSPERO registration number**

5  
6 2 CRD42019117206

7  
8 **3 Keywords**

9  
10 4 Psychogenic erectile dysfunction, Neuroimaging, Magnetic resonance imaging,  
11  
12 5 Activity likelihood estimation

13  
14 **6 Strengths and limitations of this study**

15  
16  
17 7 1. This is the first systematic review and meta-analysis which integrate and assess the  
18  
19 8 central pathological characters of pED.

20  
21 9 2. The qualitative and quantitative synthesis (activity likelihood estimation meta-  
22  
23 10 analysis) will be combining used in this study.

24  
25 11 3. A customized checklist is proposed to evaluate the quality of the included studies  
26  
27 12 according to the purpose of this review.

28  
29 13 4. This review does not restrict the race, age, and disease conditions of participants and  
30  
31 14 detailed pre-processing procedures of included studies, which will increase the  
32  
33 15 heterogeneity of included studies and may increase the risk of bias of the review.

34  
35 **16 INTRODUCTION**

36  
37 17 Erectile dysfunction (ED) is the most common male sexual disorder which  
38  
39 18 characterized by the persistent inability to attain or maintain an adequate erection to  
40  
41 19 obtain satisfactory sexual intercourse regardless of the capability of ejaculation<sup>1-3</sup>.

42  
43 20 According to the epidemiological studies, approximately 37% of men over 70 years  
44  
45 21 old, and 11% of men in 30 years old suffered from this sexual dysfunction<sup>4</sup>. As a  
46  
47 22 physical and psychosocial illness, ED not only impairs male sexual confidence and  
48  
49 23 satisfaction, but also severely impacts the quality of life (QoL)<sup>5 6</sup> and marital  
50  
51 24 relationship<sup>7</sup> of patients and their female partners. More importantly, ED has been  
52  
53 25 increasingly regarded as an independent risk factor of cardiovascular diseases<sup>8 9</sup>.

54  
55 26 According to the different causes<sup>10 11</sup>, ED is subdivided into psychogenic ED (pED),  
56  
57 27 organic ED and mixed ED. Different from organic ED which has clear causes and  
58  
59 28 pathological characters, pED is generally caused by some uncertain psychological  
60

1 factors<sup>12 13</sup> and lacks specific biomarkers.

## 2 **Rationale for review**

3 Penile erection is a complex physiological process which was modulated by the central  
4 nervous system (CNS) and mediated by several neurotransmitters and neuropeptides<sup>14</sup>  
5 <sup>15</sup>. A meta-analysis identified that penile erection was regulated by several cerebral  
6 regions; and the activities of insular cortex, claustrum, putamen, and anterior  
7 midcingulate cortex were consistently positively correlated with male penile erection<sup>16</sup>.

8 With the close relationship between brain and penile erection being widely accepted,  
9 using neuroimaging techniques to explore the central pathological characters of pED  
10 attracted many researchers' attention<sup>17-22</sup>. For example, two task functional MRI (fMRI)  
11 studies focusing on male sexual arousal reported that compared with healthy controls,  
12 patients with pED manifested lower penile tumescence, larger activities in left superior  
13 parietal lobe, ventromedial prefrontal cortex and posterior cingulate cortex, as well as  
14 altered intrinsic functional connectivity at default mode network and salience network  
15 during visual erotic stimuli<sup>23 24</sup>. Resting-state fMRI studies also suggested that patients  
16 with pED not only displayed aberrant spontaneous activities at the right anterior insula,  
17 but also showed abnormal connection patterns between right anterior insula and right  
18 dorsolateral prefrontal cortex as well as right anterior insula and right temporoparietal;  
19 furthermore, both the aberrant activities at right anterior insula and the abnormal  
20 functional connection between right anterior insula and right temporoparietal were  
21 positively correlated with the scores of International Index of Erectile Function (IIEF)  
22 scale in participants<sup>25 26</sup>. With structural MRI, researchers found that compared with  
23 healthy controls, pED sufferers presented grey matter atrophy in some subcortical  
24 structures including amygdala and nucleus accumbens, and the atrophied degree of left  
25 nucleus accumbens showed a close correlation with patients' decreased erectile  
26 function<sup>27</sup>. Moreover, our previous study<sup>28</sup> also detected that patients with pED had  
27 significant microstructure alterations at splenium of the corpus callosum and multiple  
28 white matter regions.

29 Based on these neuroimaging studies, we could easily conclude that pED not only was

1 a genitourinary disease, but also had abnormal alterations in both brain structure and  
2 function. However, there is still no integrated study to summarize the scattered evidence  
3 in individual studies, and the central pathological alterations associated with pED  
4 remain unclear. Therefore, launching a rigorous systematic review to synthesize the  
5 hitherto existing studies is necessary, which will improve our knowledge to the  
6 neurological underpinnings of pED and help to better understand the role of CNS in  
7 sexual activity.

## 8 **Objectives**

9 The objective of this systematic review is to integrate and assess the evidence of the  
10 impact of pED on men's brain and to contribute a comprehensive summary of brain  
11 structural and functional alterations in patients with pED. Furthermore, this review also  
12 aims to synthesize the probable associations between the statistical differences  
13 observed in some brain regions regarding the function or structure and the clinical  
14 characters such as behavioural /psychophysiological data, disease-related scales, QoL  
15 scales, and emotional scales in patients with pED.

## 16 **METHODS**

17 This protocol follows the Preferred Reporting Items for Systematic Reviews and  
18 Meta-Analysis Protocols (PRISMA-P) 2015 statement<sup>29</sup> and has been registered at the  
19 PROSPERO International Prospective Register of Systematic Reviews of the  
20 University of York (registration number: CRD42019117206).

## 21 **Eligibility criteria**

22 The inclusion and exclusion criteria of studies will be described with the following  
23 items:

### 24 *Types of study*

25 The case-control studies, cohort studies, as well as randomized controlled trials will be  
26 included only if the original data of neuroimaging findings could be extracted. The case  
27 reports, narrative or systematic reviews, meta-analyses, letters, and other second-hand  
28 studies will be excluded.

## 1 **Study design**

2 Neuroimaging studies which centred on the differences of brain structure, brain  
3 functional activity, structural and functional connectivity, etc. between patients with  
4 pED and healthy controls will be included. The longitudinal studies focusing on the  
5 management of pED will also be considered as long as the baseline neuroimaging data  
6 were reported. Both the resting-state and task neuroimaging studies will be included,  
7 and no neuroimaging modality will be restricted. Any publication acquired data using  
8 multimodal neuroimaging techniques from the same participants will be collected  
9 separately in this review<sup>30</sup>.

## 10 **Participants**

11 Participants will be limited at the clearly diagnosed patients with pED and the parallel  
12 healthy controls. The minimum sample size for inclusion is restricted at 12 participants  
13 per group according to previous studies<sup>30-32</sup>. The race, age, and disease conditions  
14 (drug-naïve or drug-invented) of participants will not be restricted in this review.

## 15 **Exposure**

16 Patients with pED should be diagnosed with comprehensive history taking, physical  
17 examinations and even specific examinations according to the diagnostic guidelines  
18 of European Association of Urology (EAU)<sup>33-35</sup>, American Urological Association  
19 (AUA)<sup>36 37</sup> or other authoritative organizations<sup>38</sup>. The organic ED or mixed ED, or  
20 patients with other andrological or cardiovascular complications will be excluded.  
21 Some studies enrolling patients without clear discrimination of subtypes of ED will be  
22 considered after the comprehensive full-text assessment or contacting the authors to  
23 identify the patients as pED.

## 24 **Comparators**

25 Containing the parallel healthy control group is required for studies to be included in  
26 the current review. Healthy controls in those studies should never be diagnosed with  
27 ED before enrolment and had been reverified with the clinical examinations during  
28 researches. Studies absenting from healthy controls or contrasting with previous studies  
29 will be excluded.

## 1 **Outcome measures**

2 The primary outcomes of the included studies should be the functional and structural  
3 alterations in the brain of the patients with pED. The outcomes of brain structure include  
4 white matter microstructure, gray matter density and volume, and structural  
5 connectivity. The outcomes of brain function include whole-brain /region-of-interest  
6 functional activity, functional connectivity (fMRI based on blood-oxygen-level-  
7 dependent (BOLD) signal or cerebral blood flow), brain molecular metabolism  
8 (Positron Emission Tomography (PET), Single-Photon Emission Computed  
9 Tomography (SPECT)), neurochemical activity (Magnetic Resonance Spectroscopy  
10 (MRS)) as well as brain electrical activity (Electroencephalogram (EEG)), etc. The  
11 secondary outcomes of these studies may contain behavioural /psychophysiological  
12 data (such as genital responses, heart and respiratory rates<sup>23 24</sup>), symptom-related  
13 scales (such as IIEF-5<sup>39</sup>, Quality of Erection Questionnaire (QEQ)<sup>40</sup>, and the Erection  
14 Hardness Score (EHS))<sup>41</sup>, QoL questionnaire (the Sexual Life Quality Questionnaire  
15 (SLQQ))<sup>42</sup> and psychological assessment scales (such as Self-Rating Anxiety Scale  
16 (SAS)<sup>43</sup>, Self-Rating Depression Scale (SDS)<sup>44</sup>, and Brief Psychiatric Rating Scale  
17 (BPRS)<sup>45</sup>). Studies only have primary outcome will also be included in this review.

## 18 **Report characteristics**

19 The peer-reviewed original studies will be included, the conference proceedings and  
20 unpublished theses will be excluded. The publishing time will be restricted up to 1  
21 October 2019 (the anticipated completion date of this review) and the language will be  
22 restricted at English and Chinese.

## 23 **Searching strategy**

24 Electronic searching will be conducted in PubMed, EMBASE, Web of Science, China  
25 Biology Medicine Database (CBM) and China National Knowledge Infrastructure  
26 (CNKI) using the medical subject headings (MeSH) terms. The searching strategies of  
27 PubMed (English) and CNKI (Chinese) are displayed in Table 1 and will be replicated  
28 for other electronic databases. Thereafter, the snowballing searching strategy will be

1 employed to find other eligible studies according to the reference lists of enrolled  
2 literature. In addition, the WHO International Clinical Trials Registry Platform will also  
3 be searched to mining more potential results.

4 [Insert Table 1 here]

## 5 **Selection process**

6 Covidence (<https://www.covidence.org>), the Cochrane Library recommend online  
7 systematic review management system, will be used to manage literature. The initial  
8 searching results with the above strategies will be uploaded to Covidence. After  
9 duplicates removed, TY will screen the title and abstract to remove the obviously  
10 irrelevant records; and then, the two reviewers (TY and JX) will parallelly complete the  
11 abstract and full-text review. Any disagreement between TY and JX will be  
12 reconsidered by a third reviewer (ZL). In order to assess the reliability of the selection  
13 criteria and the inter-rater agreement between the two reviewers, the Cohen's Kappa  
14 will be calculated at the parallel selection stage, and the Kappa coefficient ( $k$ ) over 0.75  
15 indicates high reliability<sup>46</sup>. The selection process of records will be reported using the  
16 PRISMA flow diagram<sup>47</sup> and the eliminated reasons for those ineligible records will be  
17 detailed reported.

## 18 **Data collection**

19 The two independent reviewers (TY and JX) will doubly extract data using a standard  
20 data extraction spreadsheet in Excel. Again, any inconsistency between these two  
21 reviewers will also be consulted and judged by ZL, the third reviewer.

22 The following information will be retrieved and extracted from each record.

- 23 ● Publication information: title, first author, publishing time, country /region,  
24 funding supports.
- 25 ● Details of methodology: participants, sample size, diagnostic criteria,  
26 demographic characteristics (including age, handedness, ethnicity, and  
27 education), imaging modalities, data analysis strategies, and clinical outcomes.
- 28 ● Results: the significant altered cerebral regions (described with peak MNI

1 /Talairach coordinate, cluster size, and statistical threshold), the value of  
2 clinical characters (behavioural /psychophysiological data, disease-related  
3 scales, QoL scales, emotional scales, etc.), and the correlations between  
4 imaging data and clinical data.

5 Any missing or question about the above data will be settled by contacting the authors.  
6 If no clarification is provided after 4 weeks, the study will still be included in the final  
7 analysis with the missing information marked.

## 8 **Outcomes and prioritization**

9 The primary outcome of this review is the significant altered cerebral regions in patients  
10 with pED compared with healthy controls. Due to the variety of analytical methods and  
11 great heterogeneity of the statistical thresholds of studies (e.g. voxel cluster size  
12 thresholds, statistic magnitudes, methods of correcting for multiple comparisons), it is  
13 unrealistic to set a uniform significance threshold. Therefore, the ‘significant’ results  
14 will follow the study authors’ own criteria<sup>48</sup>. Some neuroimaging studies also reported  
15 results trending to significant or significant only before correction<sup>48</sup>. For a more  
16 comprehensive view, these regions will be collected with special symbols in the  
17 qualitative synthesis. The secondary outcome of this review is the associations of the  
18 altered cerebral structure /function and the clinical characters which mainly include  
19 behavioural /psychophysiological data, disease-related scales, QoL scales, emotional  
20 scales, and so on. The values of these clinical characters will be recorded, and they  
21 might be used to explain the inter-studies variability when necessary.

## 22 **Quality assessment**

23 There are no standardized criteria for quality assessment of neuroimaging studies<sup>49 50</sup>.  
24 Authors of the previous systematic reviews always developed their own quality  
25 assessment tools based on some existing tools (such as QUADAS-2, Newcastle-Ottawa  
26 Scale (NOS))<sup>49 51-55</sup>. However, because of the diverse objects of studies, the currently  
27 existing assessment tools are not very suitable for our review. Therefore, after referring  
28 the NOS<sup>56</sup>, some published systematic reviews<sup>49-51 57</sup> and the Committee on Best

1  
2  
3  
4 1 Practices in Data Analysis and Sharing in Neuroimaging Using MRI<sup>58</sup>  
5 (http://www.humanbrainmapping.org), a customized checklist is proposed in the  
6  
7 2  
8 3 current review. This checklist will be used to evaluate the quality of the included studies  
9  
10 4 from 9 items (Table 2). Each item is scored as 1 (Yes) or 0 (No or Don't know), and  
11  
12 5 the summation of items generates an overall quality score (0–9 points). The quality  
13  
14 6 levels of studies are defined as high (8–9 points), medium (5–7points) and low (0–4  
15  
16 7 points).

17  
18 [Insert Table 2 here]

19 9 Quality assessment will be performed by a professional assessor (LL) who is  
20  
21 10 experienced with quality assessment scoring and a non-professional assessor (RS) who  
22  
23 11 have never engaged in quality assessment of systematic reviews. These two assessors  
24  
25 12 will independently evaluate the enrolled studies based on the checklist; any discrepancy  
26  
27 13 will also be reconsidered by the third reviewer (ZL). Again, the inter-rater agreement  
28  
29 14 will be assessed by Cohen's Kappa with the threshold  $k > 0.75$  indicating high reliability.

### 31 **Data Synthesis**

32  
33 16 Firstly, collected data including publication information, methodologies, and the  
34  
35 17 significant findings of studies will be summarized with a table. And then, a qualitative  
36  
37 18 review will be performed to synthesize the brain structural and functional alterations  
38  
39 19 and the correlations between these altered cerebral structure/ function and the clinical  
40  
41 20 characters in patients with pED. For a clearer presentation, these findings will be  
42  
43 21 integrated separately according to the task /resting design and neuroimaging modalities.  
44  
45 22 If feasible (17 or more resting-state studies are included<sup>59</sup>), an activity likelihood  
46  
47 23 estimation meta-analysis<sup>60 61</sup> will be launched to quantitatively synthesize the  
48  
49 24 differences of cerebral structure and function between patients with pED and healthy  
50  
51 25 controls. The subgroup analyses will not be performed in this review. The strength of  
52  
53 26 evidence for the final conclusion of this review will be determined by the checklist  
54  
55 27 described above.

### 57 **CONCLUSION**

1 While neuroimaging studies have verified the existence of brain structural and  
2 functional alterations in patients with pED, the scattered neuroimaging biomarkers of  
3 pED in individual studies have yet been summarized. Therefore, this systematic review  
4 is launched, aiming to synthesize the central pathological characters and the  
5 associations between the altered brain structure /function and clinical characters of pED.  
6 The current review will be the first to synthesize the neuroimaging evidence of pED in  
7 a systematic way, to include a meta-analysis of the findings, and the first to assess the  
8 quality of these neuroimaging studies. This work will provide a coherent synthesis of  
9 the recent neuroimaging studies on pED and improve our knowledge to the neurological  
10 underpinnings of pED.

### 11 **Patient and public involvement**

12 This is a protocol for systematic review; no patients and public were involved.

### 13 **Ethics and dissemination**

14 Ethical approval is not required for this study. This review will be published in a peer-  
15 reviewed journal and presented at conferences.

### 16 **Contributors**

17 Peihai Zhang was responsible for this study. Tao Yin, Zhengjie Li and Peihai Zhang  
18 conceived and designed the study. Tao Yin, Zhengjie Li and Jing Xiong participated in  
19 drafting the protocol and preparing the manuscript. Lei Lan, Ruirui Sun and Feiqiang  
20 Ren provided feedback on the study design and protocol. All authors read and approved  
21 the final manuscript.

### 22 **Funding**

23 This work is financially supported by the National Natural Science Foundation of China  
24 (NO.81774137).

### 25 **Competing interests**

26 The authors declare that they have no competing interests.

### 27 **Patient consent**

1 Not required.

## 2 **Data sharing statement**

3 This paper does not include the original data.

## 4 **Reference**

- 5 1. Najari BB, Kashanian JA. Erectile Dysfunction. *Jama* 2016;**316**:1838. doi:  
6 10.1001/jama.2016.12284
- 7 2. Muneer A, Kalsi J, Nazareth I, *et al.* Erectile dysfunction. *Bmj* 2014;**348**:g129. doi:  
8 10.1136/bmj.g129
- 9 3. Montorsi F, Adaiyan G, Becher E, *et al.* Summary of the recommendations on sexual  
10 dysfunctions in men. *J Sex Med* 2010;**7**:3572-88. doi: 10.1111/j.1743-6109.2010.02062.x
- 11 4. Rosen RC, Fisher WA, Eardley I, *et al.* The multinational Men's Attitudes to Life Events and  
12 Sexuality (MALES) study: I. Prevalence of erectile dysfunction and related health concerns in  
13 the general population. *Curr Med Res Opin* 2004;**20**:607-17. doi:  
14 10.1185/030079904125003467
- 15 5. Li HJ, Bai WJ, Dai YT, *et al.* An analysis of treatment preferences and sexual quality of life  
16 outcomes in female partners of Chinese men with erectile dysfunction. *Asian J Androl*  
17 2016;**18**:773-9. doi: 10.4103/1008-682x.159719
- 18 6. Yafi FA, Jenkins L, Albersen M, *et al.* Erectile dysfunction. *Nat Rev Dis Primers* 2016;**2**:16003.  
19 doi: 10.1038/nrdp.2016.3
- 20 7. Boddì V, Corona G, Fisher AD, *et al.* "It takes two to tango": the relational domain in a cohort  
21 of subjects with erectile dysfunction (ED). *J Sex Med* 2012;**9**:3126-36. doi: 10.1111/j.1743-  
22 6109.2012.02948.x

- 1  
2  
3  
4 1 8. Uddin SMI, Mirbolouk M, Dardari Z, *et al*. Erectile Dysfunction as an Independent Predictor  
5  
6  
7 2 of Future Cardiovascular Events: The Multi-Ethnic Study of Atherosclerosis. *Circulation* 2018  
8  
9 3 doi: 10.1161/circulationaha.118.033990  
10  
11  
12 4 9. Dong JY, Zhang YH, Qin LQ. Erectile dysfunction and risk of cardiovascular disease: meta-  
13  
14 5 analysis of prospective cohort studies. *J Am Coll Cardiol* 2011;**58**:1378-85. doi:  
15  
16 6 10.1016/j.jacc.2011.06.024  
17  
18  
19 7 10. Glina S, Cohen DJ, Vieira M. Diagnosis of erectile dysfunction. *Curr Opin Psychiatry*  
20  
21 8 2014;**27**:394-9. doi: 10.1097/ycp.0000000000000097  
22  
23  
24 9 11. Shamloul R, Ghanem H. Erectile dysfunction. *Lancet* 2013;**381**:153-65. doi:  
25  
26 10 10.1016/s0140-6736(12)60520-0  
27  
28  
29 11 12. Rastrelli G, Maggi M. Erectile dysfunction in fit and healthy young men: psychological or  
30  
31 12 pathological? *Transl Androl Urol* 2017;**6**:79-90. doi: 10.21037/tau.2016.09.06  
32  
33  
34 13 13. Papagiannopoulos D, Khare N, Nehra A. Evaluation of young men with organic erectile  
35  
36 14 dysfunction. *Asian J Androl* 2015;**17**:11-6. doi: 10.4103/1008-682x.139253  
37  
38  
39 15 14. Courtois F, Carrier S, Charvier K, *et al*. The control of male sexual responses. *Curr Pharm*  
40  
41 16 *Des* 2013;**19**:4341-56. doi: 10.2174/13816128113199990333  
42  
43  
44 17 15. Argiolas A, Rosaria Melis M. Neuromodulation of penile erection: an overview of the role of  
45  
46 18 neurotransmitters and neuropeptides. *Prog Neurobiol* 1995;**47**:235-55. doi:  
47  
48 19 [https://doi.org/10.1016/0301-0082\(95\)80003-Q](https://doi.org/10.1016/0301-0082(95)80003-Q)  
49  
50  
51 20 16. Poepl TB, Langguth B, Laird AR, *et al*. The functional neuroanatomy of male psychosexual  
52  
53 21 and physiosexual arousal: a quantitative meta-analysis. *Hum Brain Mapp* 2014;**35**:1404-21. doi:  
54  
55 22 10.1002/hbm.22262  
56  
57  
58  
59  
60

- 1  
2  
3  
4 17. Chen J, Chen Y, Gao Q, *et al.* Impaired Prefrontal-Amygdala Pathway, Self-Reported  
5  
6  
7 2 Emotion, and Erection in Psychogenic Erectile Dysfunction Patients With Normal Nocturnal  
8  
9  
10 3 Erection. *Front Hum Neurosci* 2018;**12**:157. doi: 10.3389/fnhum.2018.00157  
11  
12 4 18. Wu J, He Z, Chen X, *et al.* Altered brain networks in psychogenic erectile dysfunction: a  
13  
14 5 resting-state fMRI study. *Brain Imaging Behav* 2017;**5**:1073-81. doi: 10.1007/s11682-017-  
15  
16 6 9805-910.1111/andr.12411  
17  
18  
19 7 19. Winder K, Linker RA, Seifert F, *et al.* Insular multiple sclerosis lesions are associated with  
20  
21 8 erectile dysfunction. 2018;**265**:783-92. doi: 10.1007/s00415-018-8763-5  
22  
23  
24 9 20. Jin C, Guan M, Dong M. Aberrant baseline brain activity in psychogenic erectile dysfunction  
25  
26 10 patients: a resting state fMRI study. *J Neurol* 2018;**12**:1393-404. doi: 10.1007/s00415-018-  
27  
28 11 8763-510.1007/s11682-017-9805-9  
29  
30  
31 12 21. Chen Y, Chen G, Dai Y, *et al.* Brain structural network topological alterations of the left  
32  
33 13 prefrontal and limbic cortex in psychogenic erectile dysfunction. *Andrology* 2018;**128**:393-403.  
34  
35 14 doi: 10.1111/andr.1241110.1080/00207454.2017.1387116  
36  
37  
38 15 22. Wang T, Liu B, Wu ZJ, *et al.* Hypothalamus may be involved in psychogenic erectile  
39  
40 16 dysfunction. *Zhonghua Nan Ke Xue* 2008;**14**:602-5. doi: 10.13263/j.cnki.nja.2008.07.007  
41  
42  
43 17 23. Cera N, Di Pierro ED, Sepede G, *et al.* The role of left superior parietal lobe in male sexual  
44  
45 18 behavior: dynamics of distinct components revealed by FMRI. *J Sex Med* 2012;**9**:1602-12. doi:  
46  
47 19 10.1111/j.1743-6109.2012.02719.x  
48  
49  
50 20 24. Cera N, Di Pierro ED, Ferretti A, *et al.* Brain networks during free viewing of complex erotic  
51  
52 21 movie: new insights on psychogenic erectile dysfunction. *PLoS One* 2014;**9**:e105336. doi:  
53  
54 22 10.1371/journal.pone.0105336  
55  
56  
57  
58  
59  
60

- 1  
2  
3  
4 1 25. Jin C, Guan M, Dong M, *et al.* Aberrant baseline brain activity in psychogenic erectile  
5  
6 2 dysfunction patients: a resting state fMRI study. *Brain Imaging and Behavior* 2018;**12**:1393-404.  
7  
8  
9 3 doi: 10.1007/s11682-017-9805-9  
10  
11 4 26. Wang Y, Dong M, Guan M, *et al.* Aberrant Insula-Centered Functional Connectivity in  
12  
13 5 Psychogenic Erectile Dysfunction Patients: A Resting-State fMRI Study. *Front Hum Neurosci*  
14  
15 6 2017;**11**:221. doi: 10.3389/fnhum.2017.00221  
16  
17  
18 7 27. Cera N, Delli Pizzi S, Di Pierro ED, *et al.* Macrostructural alterations of subcortical grey  
19  
20 8 matter in psychogenic erectile dysfunction. *PLoS One* 2012;**7**:e39118. doi:  
21  
22 9 10.1371/journal.pone.0039118  
23  
24  
25 10 28. Zhang P, Liu J, Li G, *et al.* White matter microstructural changes in psychogenic erectile  
26  
27 11 dysfunction patients. *Andrology* 2014;**2**:379-85. doi: 10.1111/j.2047-2927.2014.00191.x  
28  
29  
30 12 29. Moher D, Shamseer L, Clarke M, *et al.* Preferred reporting items for systematic review and  
31  
32 13 meta-analysis protocols (PRISMA-P) 2015 statement. *Syst Rev* 2015;**4**:1. doi: 10.1186/2046-  
33  
34 14 4053-4-1  
35  
36  
37 15 30. Lees B, Mewton L, Stapinski L, *et al.* Binge drinking in young people: protocol for a  
38  
39 16 systematic review of neuropsychological, neurophysiological and neuroimaging studies. *BMJ*  
40  
41 17 *Open* 2018;**8**:e023629. doi: 10.1136/bmjopen-2018-023629  
42  
43  
44 18 31. Ewing SW, Sakhardande A, Blakemore SJ. The effect of alcohol consumption on the  
45  
46 19 adolescent brain: A systematic review of MRI and fMRI studies of alcohol-using youth.  
47  
48 20 *Neuroimage Clin* 2014;**5**:420-37. doi: 10.1016/j.nicl.2014.06.011  
49  
50  
51 21 32. Desmond JE, Glover GH. Estimating sample size in functional MRI (fMRI) neuroimaging  
52  
53 22 studies: statistical power analyses. *J Neurosci Methods* 2002;**118**:115-28. doi:  
54  
55  
56  
57  
58  
59  
60

- 1  
2  
3  
4 1 [https://doi.org/10.1016/S0165-0270\(02\)00121-8](https://doi.org/10.1016/S0165-0270(02)00121-8)  
5  
6  
7 2 33. Wespes E, Amar E, Hatzichristou D, *et al.* Guidelines on erectile dysfunction. *Eur Urol*  
8  
9 3 2002;**41**:1-5. doi: [https://doi.org/10.1016/S0302-2838\(01\)00008-2](https://doi.org/10.1016/S0302-2838(01)00008-2)  
10  
11  
12 4 34. Wespes E, Amar E, Hatzichristou D, *et al.* EAU Guidelines on erectile dysfunction: an  
13  
14 5 update. *Eur Urol* 2006;**49**:806-15. doi: 10.1016/j.eururo.2006.01.028  
15  
16  
17 6 35. Hatzimouratidis K, Amar E, Eardley I, *et al.* Guidelines on male sexual dysfunction: erectile  
18  
19 7 dysfunction and premature ejaculation. *Eur Urol* 2010;**57**:804-14. doi:  
20  
21 8 10.1016/j.eururo.2010.02.020  
22  
23  
24 9 36. Montague DK, Jarow JP, Broderick GA, *et al.* Chapter 1: The management of erectile  
25  
26 10 dysfunction: an AUA update. *J Urol* 2005;**174**:230-9. doi: 10.1097/01.ju.0000164463.19239.19  
27  
28  
29 11 37. Burnett AL, Nehra A, Breau RH, *et al.* Erectile Dysfunction: AUA Guideline. *J Urol*  
30  
31 12 2018;**200**:633-41. doi: 10.1016/j.juro.2018.05.004  
32  
33  
34 13 38. Ryu JK, Cho KS, Kim SJ, *et al.* Korean Society for Sexual Medicine and Andrology (KSSMA)  
35  
36 14 Guideline on Erectile Dysfunction. *World J Mens Health* 2013;**31**:83-102. doi:  
37  
38 15 10.5534/wjmh.2013.31.2.83  
39  
40  
41 16 39. Rosen RC, Riley A, Wagner G, *et al.* The international index of erectile function (IIEF): a  
42  
43 17 multidimensional scale for assessment of erectile dysfunction. *Urology* 1997;**49**:822-30. doi:  
44  
45 18 [https://doi.org/10.1016/S0090-4295\(97\)00238-0](https://doi.org/10.1016/S0090-4295(97)00238-0)  
46  
47  
48 19 40. Porst H, Gilbert C, Collins S, *et al.* Development and validation of the quality of erection  
49  
50 20 questionnaire. *J Sex Med* 2007;**4**:372-81. doi: 10.1111/j.1743-6109.2006.00422.x  
51  
52  
53 21 41. Mulhall JP, Goldstein I, Bushmakin AG, *et al.* Validation of the erection hardness score. *J*  
54  
55 22 *Sex Med* 2007;**4**:1626-34. doi: 10.1111/j.1743-6109.2007.00600.x  
56  
57  
58  
59  
60

- 1  
2  
3  
4 1 42. Woodward JM, Hass SL, Woodward PJ. Reliability and validity of the sexual life quality  
5  
6 2 questionnaire (SLQQ). *Qual Life Res* 2002;**11**:365-77. doi:  
7  
8  
9 3 <https://doi.org/10.1023/A:1015513228469>  
10  
11 4 43. Zung WW. A rating instrument for anxiety disorders. *Psychosomatics* 1971;**12**:371-9. doi:  
12  
13 5 10.1016/s0033-3182(71)71479-0  
14  
15 6 44. Zung WW. A SELF-RATING DEPRESSION SCALE. *Arch Gen Psychiatry* 1965;**12**:63-70.  
16  
17 7 doi: doi:10.1001/archpsyc.1965.01720310065008  
18  
19 8 45. Overall JE, Gorham DR. The Brief Psychiatric Rating Scale. *Psychological Reports*  
20  
21 9 1962;**10**:799-812. doi: 10.2466/pr0.1962.10.3.799  
22  
23 10 46. McHugh ML. Interrater reliability: the kappa statistic. *Biochem Med (Zagreb)* 2012;**22**:276-  
24  
25 11 82.  
26  
27 12 47. Moher D, Liberati A, Tetzlaff J, *et al*. Preferred reporting items for systematic reviews and  
28  
29 13 meta-analyses: the PRISMA statement. *PLoS Med* 2009;**6**:e1000097. doi:  
30  
31 14 10.1371/journal.pmed.1000097  
32  
33 15 48. Fox KC, Nijeboer S, Dixon ML, *et al*. Is meditation associated with altered brain structure?  
34  
35 16 A systematic review and meta-analysis of morphometric neuroimaging in meditation  
36  
37 17 practitioners. *Neurosci Biobehav Rev* 2014;**43**:48-73. doi: 10.1016/j.neubiorev.2014.03.016  
38  
39 18 49. Soiza RL, Sharma V, Ferguson K, *et al*. Neuroimaging studies of delirium: a systematic  
40  
41 19 review. *J Psychosom Res* 2008;**65**:239-48. doi: 10.1016/j.jpsychores.2008.05.021  
42  
43 20 50. Haggstrom L, Welschinger R, Caplan GA. Functional neuroimaging offers insights into  
44  
45 21 delirium pathophysiology: A systematic review. *Australasian Journal on Ageing* 2017;**36**:186-  
46  
47 22 92. doi: 10.1111/ajag.12417.  
48  
49  
50  
51  
52  
53  
54  
55  
56  
57  
58  
59  
60

- 1  
2  
3  
4 1 51. Lavagnino L, Arnone D, Cao B, *et al*. Inhibitory control in obesity and binge eating disorder:  
5  
6 2 A systematic review and meta-analysis of neurocognitive and neuroimaging studies. *Neurosci*  
7  
8 3 *Biobehav Rev* 2016;**68**:714-26. doi: 10.1016/j.neubiorev.2016.06.041  
9  
10  
11 4 52. Sumner PJ, Bell IH, Rossell SL. A systematic review of task-based functional neuroimaging  
12  
13 5 studies investigating language, semantic and executive processes in thought disorder.  
14  
15 6 *Neurosci Biobehav Rev* 2018;**94**:59-75. doi: 10.1016/j.neubiorev.2018.08.005  
16  
17  
18 7 53. McCrea M, Meier T, Huber D, *et al*. Role of advanced neuroimaging, fluid biomarkers and  
19  
20 8 genetic testing in the assessment of sport-related concussion: a systematic review. *Br J Sports*  
21  
22 9 *Med* 2017;**51**:919-29. doi: 10.1136/bjsports-2016-097447  
23  
24  
25 10 54. Ailion AS, Hortman K, King TZ. Childhood Brain Tumors: a Systematic Review of the  
26  
27 11 Structural Neuroimaging Literature. *Neuropsychol Rev* 2017;**27**:220-44. doi: 10.1007/s11065-  
28  
29 12 017-9352-6  
30  
31  
32 13 55. Cagnie B, Coppieters I, Denecker S, *et al*. Central sensitization in fibromyalgia? A  
33  
34 14 systematic review on structural and functional brain MRI. *Semin Arthritis Rheum* 2014;**44**:68-  
35  
36 15 75. doi: 10.1016/j.semarthrit.2014.01.001  
37  
38  
39 16 56. Wells GA, Shea B, O'Connell D, *et al*. The Newcastle-Ottawa Scale (NOS) for assessing  
40  
41 17 the quality of nonrandomised studies in meta-analyses. Secondary The Newcastle-Ottawa  
42  
43 18 Scale (NOS) for assessing the quality of nonrandomised studies in meta-analyses 2013.  
44  
45 19 [http://www.ohri.ca/programs/clinical\\_epidemiology/oxford.asp](http://www.ohri.ca/programs/clinical_epidemiology/oxford.asp).  
46  
47  
48 20 57. Wilson PH, Smits-Engelsman B, Caeyenberghs K, *et al*. Cognitive and neuroimaging  
49  
50 21 findings in developmental coordination disorder: new insights from a systematic review of  
51  
52 22 recent research. *Dev Med Child Neurol* 2017;**59**:1117-29. doi: 10.1111/dmcn.13530  
53  
54  
55  
56  
57  
58  
59  
60

- 1  
2  
3  
4 1 58. Nichols TE, Das S, Eickhoff SB, *et al.* Best practices in data analysis and sharing in  
5  
6 2 neuroimaging using MRI. *Nature neuroscience* 2017;**20**:299-303. doi: 10.1038/nn.4500  
7  
8  
9 3 59. Eickhoff SB, Nichols TE, Laird AR, *et al.* Behavior, sensitivity, and power of activation  
10  
11 4 likelihood estimation characterized by massive empirical simulation. *Neuroimage* 2016;**137**:70-  
12  
13  
14 5 85. doi: 10.1016/j.neuroimage.2016.04.072  
15  
16  
17 6 60. Eickhoff SB, Laird AR, Grefkes C, *et al.* Coordinate-based activation likelihood estimation  
18  
19 7 meta-analysis of neuroimaging data: a random-effects approach based on empirical estimates  
20  
21 8 of spatial uncertainty. *Hum Brain Mapp* 2009;**30**:2907-26. doi: 10.1002/hbm.20718  
22  
23  
24 9 61. Turkeltaub PE, Eden GF, Jones KM, *et al.* Meta-analysis of the functional neuroanatomy of  
25  
26  
27 10 single-word reading: method and validation. *Neuroimage* 2002;**16**:765-80. doi:  
28  
29  
30 11 doi.org/10.1006/nimg.2002.1131  
31  
32  
33  
34 12  
35  
36  
37  
38  
39  
40  
41  
42  
43  
44  
45  
46  
47  
48  
49  
50  
51  
52  
53  
54  
55  
56  
57  
58  
59  
60

1 Table 1: Searching items for identifying articles in PubMed (English) and CNKI (Chinese).

| PubMed searching strategy                                     | CNKI searching strategy                   |
|---------------------------------------------------------------|-------------------------------------------|
| #1 Erectile Dysfunction [MeSH Terms]                          | #1 阳痿 [主题词]                               |
| #2 Impoten* [All Fields]                                      | #2 勃起功能障碍 [主题词]                           |
| #3 Erectile disturbance [All Fields]                          | #3 性功能障碍 [主题词]                            |
| #4 Erectile disorder [All Fields]                             | #4 ED [主题词]                               |
| #5 Sexual Dysfunction [MeSH Terms]                            | #5 #1 OR #2 OR#3 OR #4                    |
| #6 Asynodia [All Fields]                                      | #6 神经影像学 [主题词]                            |
| #7 Erection failure [All Fields]                              | #7 功能磁共振 [主题词]                            |
| #8 Penile Erection [MeSH Terms]                               | #8 磁共振成像 [主题词]                            |
| #9 #1 OR #2 OR#3 OR #4 OR #5 OR #6 OR #7                      | #9 MRI [主题词]                              |
| OR #8                                                         | #10 PET [主题词]                             |
| #10 Neuroimaging [MeSH Terms]                                 | #11 SPECT [主题词]                           |
| #11 Functional Neuroimaging [MeSH Terms]                      | #12 EEG [主题词]                             |
| #12 Brain imaging [All Fields]                                | #13 MRS [主题词]                             |
| #13 Magnetic resonance imaging [MeSH Terms]                   | #14 DTI [主题词]                             |
| #14 Magnetic resonance* [MeSH Terms]                          | #15 #6 OR #7 OR #8 OR #9 OR #10           |
| #15 MRI [All Fields]                                          | OR#11 OR #12 OR #13 OR #14                |
| #16 Tomography [MeSH Terms]                                   | <b>#16 Final search terms: #5 AND #15</b> |
| #17 Positron Emission Tomography [MeSH Terms]                 |                                           |
| #18 Tomography, Emission-Computed, Single-Photon [MeSH Terms] |                                           |
| #19 PET [All Fields]                                          |                                           |
| #20 PET-CT [All Fields]                                       |                                           |
| #21 Single Photon Emission Computed Tomography [MeSH Terms]   |                                           |
| #22 SPECT[All Fields]                                         |                                           |
| #23 Electroencephalography [MeSH Terms]                       |                                           |
| #24 EEG [All Fields]                                          |                                           |
| #25 Magnetic Resonance Spectroscopy [MeSH Terms]              |                                           |
| #26 MRS [All Fields]                                          |                                           |
| #27 Diffusion Tensor Imaging [MeSH Terms]                     |                                           |
| #28 DTI [All Fields]                                          |                                           |
| #29 #10 OR#11 OR #12 OR #13 OR #14 OR #15                     |                                           |
| OR #16 OR #17 OR #18 OR #19 OR #20 OR #21                     |                                           |
| OR #22 OR #23 OR #24 OR #25 OR #26 OR #27                     |                                           |
| OR #28                                                        |                                           |
| <b>#30 Final search terms: #9 AND #29</b>                     |                                           |

2

3

1 Table 2. The checklist of quality assessment.

| Quality assessment categories                                                                                                           | yes | No | Don't know |
|-----------------------------------------------------------------------------------------------------------------------------------------|-----|----|------------|
| 1. The study addressed an explicit question (theory-driven).                                                                            |     |    |            |
| 2. With sufficient sample size or used justified power calculation.                                                                     |     |    |            |
| 3. With clearly inclusion criteria and exclusion criteria of participants.                                                              |     |    |            |
| 4. Controlled the important confounding factors such as age, handedness, and education of participants.                                 |     |    |            |
| 5. With adequate quality control during data acquisition.                                                                               |     |    |            |
| 6. Described the response rate in detail.                                                                                               |     |    |            |
| 7. Assessed outcomes with blinded or third-party assessors.                                                                             |     |    |            |
| 8. Used appropriate multiple testing correction in statistical modelling and inference.                                                 |     |    |            |
| 9. Reported detailed imaging results including MNI/Talairach coordinate, statistic magnitudes cluster sizes, and statistical threshold. |     |    |            |

2

3

**PRISMA-P (Preferred Reporting Items for Systematic review and Meta-Analysis Protocols) 2015 checklist: recommended items to address in a systematic review protocol\***

| Section and topic                 | Item No | Checklist item                                                                                                                                                                                  |                  |
|-----------------------------------|---------|-------------------------------------------------------------------------------------------------------------------------------------------------------------------------------------------------|------------------|
| <b>ADMINISTRATIVE INFORMATION</b> |         |                                                                                                                                                                                                 |                  |
| Title:                            |         |                                                                                                                                                                                                 |                  |
| Identification                    | 1a      | Identify the report as a protocol of a systematic review                                                                                                                                        | Line 3, Page 1   |
| Update                            | 1b      | If the protocol is for an update of a previous systematic review, identify as such                                                                                                              |                  |
| Registration                      | 2       | If registered, provide the name of the registry (such as PROSPERO) and registration number                                                                                                      | Line 2, Page 3   |
| Authors:                          |         |                                                                                                                                                                                                 |                  |
| Contact                           | 3a      | Provide name, institutional affiliation, e-mail address of all protocol authors; provide physical mailing address of corresponding author                                                       | Page 1           |
| Contributions                     | 3b      | Describe contributions of protocol authors and identify the guarantor of the review                                                                                                             | Line 10, Page 11 |
| Amendments                        | 4       | If the protocol represents an amendment of a previously completed or published protocol, identify as such and list changes; otherwise, state plan for documenting important protocol amendments | Not applicable   |
| Support:                          |         |                                                                                                                                                                                                 |                  |
| Sources                           | 5a      | Indicate sources of financial or other support for the review                                                                                                                                   | Line 16, Page 11 |
| Sponsor                           | 5b      | Provide name for the review funder and/or sponsor                                                                                                                                               | Line 16, Page 11 |
| Role of sponsor or funder         | 5c      | Describe roles of funder(s), sponsor(s), and/or institution(s), if any, in developing the protocol                                                                                              | Line 16, Page 11 |
| <b>INTRODUCTION</b>               |         |                                                                                                                                                                                                 |                  |
| Rationale                         | 6       | Describe the rationale for the review in the context of what is already known                                                                                                                   | Line 1, Page 4   |
| Objectives                        | 7       | Provide an explicit statement of the question(s) the review will address with reference to participants, interventions, comparators, and outcomes (PICO)                                        | Line 7, Page 5   |
| <b>METHODS</b>                    |         |                                                                                                                                                                                                 |                  |
| Eligibility criteria              | 8       | Specify the study characteristics (such as PICO, study design, setting, time frame) and report                                                                                                  | Line 20, Page 5  |

|                                    |     |                                                                                                                                                                                                                                                  |                  |
|------------------------------------|-----|--------------------------------------------------------------------------------------------------------------------------------------------------------------------------------------------------------------------------------------------------|------------------|
|                                    |     | characteristics (such as years considered, language, publication status) to be used as criteria for eligibility for the review                                                                                                                   |                  |
| Information sources                | 9   | Describe all intended information sources (such as electronic databases, contact with study authors, trial registers or other grey literature sources) with planned dates of coverage                                                            | Line 4, Page 7   |
| Search strategy                    | 10  | Present draft of search strategy to be used for at least one electronic database, including planned limits, such that it could be repeated                                                                                                       | Table 1, Page 16 |
| Study records:                     |     |                                                                                                                                                                                                                                                  |                  |
| Data management                    | 11a | Describe the mechanism(s) that will be used to manage records and data throughout the review                                                                                                                                                     | Line 4, Page 8   |
| Selection process                  | 11b | State the process that will be used for selecting studies (such as two independent reviewers) through each phase of the review (that is, screening, eligibility and inclusion in meta-analysis)                                                  | Line 3, Page 8   |
| Data collection process            | 11c | Describe planned method of extracting data from reports (such as piloting forms, done independently, in duplicate), any processes for obtaining and confirming data from investigators                                                           | Line 16, Page 8  |
| Data items                         | 12  | List and define all variables for which data will be sought (such as PICO items, funding sources), any pre-planned data assumptions and simplifications                                                                                          | Line 20, Page 8  |
| Outcomes and prioritization        | 13  | List and define all outcomes for which data will be sought, including prioritization of main and additional outcomes, with rationale                                                                                                             | Line 5, Page 9   |
| Risk of bias in individual studies | 14  | Describe anticipated methods for assessing risk of bias of individual studies, including whether this will be done at the outcome or study level, or both; state how this information will be used in data synthesis                             | Not applicable   |
| Data synthesis                     | 15a | Describe criteria under which study data will be quantitatively synthesised                                                                                                                                                                      | Line 12, Page 10 |
|                                    | 15b | If data are appropriate for quantitative synthesis, describe planned summary measures, methods of handling data and methods of combining data from studies, including any planned exploration of consistency (such as $I^2$ , Kendall's $\tau$ ) | Line 12, Page 10 |
|                                    | 15c | Describe any proposed additional analyses (such as sensitivity or subgroup analyses, meta-regression)                                                                                                                                            | Line 20, Page 10 |
|                                    | 15d | If quantitative synthesis is not appropriate, describe the type of summary planned                                                                                                                                                               | Line 17, Page 10 |
| Meta-bias(es)                      | 16  | Specify any planned assessment of meta-bias(es) (such as publication bias across studies, selective                                                                                                                                              | Not applicable   |

---

reporting within studies)

---

Confidence in cumulative  
evidence

17

Describe how the strength of the body of evidence will be assessed (such as GRADE)

Line 19, Page 9

---

**\* It is strongly recommended that this checklist be read in conjunction with the PRISMA-P Explanation and Elaboration (cite when available) for important clarification on the items. Amendments to a review protocol should be tracked and dated. The copyright for PRISMA-P (including checklist) is held by the PRISMA-P Group and is distributed under a Creative Commons Attribution Licence 4.0.**

*From: Shamseer L, Moher D, Clarke M, Ghersi D, Liberati A, Petticrew M, Shekelle P, Stewart L, PRISMA-P Group. Preferred reporting items for systematic review and meta-analysis protocols (PRISMA-P) 2015: elaboration and explanation. BMJ. 2015 Jan 2;349(jan02 1):g7647.*

# BMJ Open

## Neuroimaging biomarkers of psychogenic erectile dysfunction: protocol for a systematic review

|                                 |                                                                                                                                                                                                                                                                                                                                                                                                                                                                                                                                                                                                                                                                                                                                                                                    |
|---------------------------------|------------------------------------------------------------------------------------------------------------------------------------------------------------------------------------------------------------------------------------------------------------------------------------------------------------------------------------------------------------------------------------------------------------------------------------------------------------------------------------------------------------------------------------------------------------------------------------------------------------------------------------------------------------------------------------------------------------------------------------------------------------------------------------|
| Journal:                        | <i>BMJ Open</i>                                                                                                                                                                                                                                                                                                                                                                                                                                                                                                                                                                                                                                                                                                                                                                    |
| Manuscript ID                   | bmjopen-2019-030061.R2                                                                                                                                                                                                                                                                                                                                                                                                                                                                                                                                                                                                                                                                                                                                                             |
| Article Type:                   | Protocol                                                                                                                                                                                                                                                                                                                                                                                                                                                                                                                                                                                                                                                                                                                                                                           |
| Date Submitted by the Author:   | 29-Jul-2019                                                                                                                                                                                                                                                                                                                                                                                                                                                                                                                                                                                                                                                                                                                                                                        |
| Complete List of Authors:       | Yin, Tao; Chengdu University of Traditional Chinese Medicine , Acupuncture and Tuina School/The 3rd Teaching Hospital<br>Li, Zhengjie; Chengdu University of Traditional Chinese Medicine, Acupuncture and Tuina School/The 3rd Teaching Hospital<br>Xiong, Jing; Acupuncture and Tuina School/The 3rd Teaching Hospital, Chengdu University of Traditional Chinese Medicine<br>Lan, L.; Acupuncture and Tuina School/The 3rd Teaching Hospital, Chengdu University of Traditional Chinese Medicine<br>SUN, RUIRUI; Acupuncture and Tuina School/The 3rd Teaching Hospital, Chengdu University of Traditional Chinese Medicine<br>Ren, Feiqiang; Chengdu University of Traditional Chinese Medicine, Zhang, Peihai; Hospital of Chengdu University of Traditional Chinese Medicine |
| <b>Primary Subject Heading</b>: | Sexual health                                                                                                                                                                                                                                                                                                                                                                                                                                                                                                                                                                                                                                                                                                                                                                      |
| Secondary Subject Heading:      | Urology                                                                                                                                                                                                                                                                                                                                                                                                                                                                                                                                                                                                                                                                                                                                                                            |
| Keywords:                       | Neuroimaging, Magnetic resonance imaging < RADIOLOGY & IMAGING, Psychogenic erectile dysfunction, Activation likelihood estimation                                                                                                                                                                                                                                                                                                                                                                                                                                                                                                                                                                                                                                                 |
|                                 |                                                                                                                                                                                                                                                                                                                                                                                                                                                                                                                                                                                                                                                                                                                                                                                    |

SCHOLARONE™  
Manuscripts

1  
2  
3  
4  
5 **1 Title page**

6  
7  
8 **2 Title**

9  
10 Neuroimaging biomarkers of psychogenic erectile dysfunction: protocol for a  
11 systematic review  
12

13  
14 **5 Authors and Affiliations**

15  
16 Tao Yin<sup>1#</sup>, Zhengjie Li<sup>1,2#</sup>, Jing Xiong<sup>1</sup>, Lei Lan<sup>1,2</sup>, Ruirui Sun<sup>1,2</sup>, Feiqiang Ren<sup>1</sup>, Peihai  
17 Zhang<sup>3\*</sup>  
18

19  
20 <sup>1</sup> Acupuncture and Tuina School /The 3rd Teaching Hospital, Chengdu University of  
21 Traditional Chinese Medicine, Chengdu, Sichuan, China, 610075;  
22

23  
24 <sup>2</sup> Acupuncture-Brain Research Center, Chengdu University of Traditional Chinese  
25 Medicine, Chengdu, Sichuan, China, 610075;  
26

27  
28 <sup>3</sup> Hospital of Chengdu University of Traditional Chinese Medicine, Chengdu, Sichuan,  
29 China, 610072.  
30

31  
32 #Co-first authors: Tao Yin and Zhengjie Li contributed equally to this article.  
33

34  
35 \*Corresponding authors: Peihai Zhang.

36  
37 **Email:** Tao Yin: yintao@stu.cdutcm.edu.cn; Zhengjie Li: lzjbenjamin@163.com; Jing  
38

39 Xiong: 1924634685@qq.com; Ruirui Sun: cpsrr@126.com; Lei Lan:  
40

41 lanleicdutcm281@139.com; Feiqiang Ren: swingsflying@163.com; Peihai Zhang:  
42

43 zhangpeihai@126.com.  
44  
45

46  
47 **20 Correspondences**

48  
49 Peihai Zhang, Hospital of Chengdu University of Traditional Chinese Medicine; Postal  
50 address: No. 39 Shi-er-qiao Road, Chengdu, Sichuan Province, P. R. China, 610072;  
51

52  
53 Tel: +086 18908173378; E-mail address: zhangpeihai@126.com.  
54  
55  
56  
57  
58  
59  
60

# 1                    **Neuroimaging biomarkers of psychogenic erectile dysfunction:** 2                    **protocol for a systematic review**

## 3                    **ABSTRACT**

### 4                    **Introduction**

5                    Erectile dysfunction (ED) is the most common male sexual disorder that severely  
6                    impacts the sexual performance and quality of life of men. As the main subtype of ED,  
7                    psychogenic ED (pED) has been demonstrated to be a genitourinary disease and also  
8                    associated with alterations in both brain structure and function. However, the scattered  
9                    neuroimaging evidence from individual studies has not yet been integrated, and the  
10                    central pathological alterations associated with pED remain unclear. The objective of  
11                    this systematic review is to integrate and assess the evidence of the impact of pED on  
12                    brain structure and function.

### 13                    **Methods and analysis**

14                    Five databases (PubMed, EMBASE, Web of Science, China Biology Medicine  
15                    Database, and China National Knowledge Infrastructure) will be systematically  
16                    searched from inception to 1 October 2019 (the anticipated completion date of this  
17                    review), with language restricted to English and Chinese. Studies focusing on the  
18                    structural or functional alterations in patients with pED will be retrieved. The study  
19                    selection process will follow the PRISMA guideline and quality assessment will be  
20                    conducted with a customized checklist. After data extraction, a qualitative review will  
21                    be performed to synthesize the structural and functional brain alterations as well as the  
22                    correlations between the altered cerebral structures and functions and the clinical  
23                    characteristics of patients with pED. If the collected data make it feasible, an activation  
24                    likelihood estimation meta-analysis will also be launched.

### 25                    **Ethics and dissemination**

26                    Ethical approval is not required as primary data will not be collected. This review will  
27                    be published in a peer-reviewed journal and presented at conferences.

### 28                    **PROSPERO registration number**

1  
2  
3  
4 1 CRD42019117206

5  
6 2 **Keywords**

7 3 Psychogenic erectile dysfunction, Neuroimaging, Magnetic resonance imaging,  
8 4 Activation likelihood estimation

9  
10  
11 5 **Strengths and limitations of this study**

12 6 1. This is the first systematic review and meta-analysis that integrates and assesses the  
13 7 central pathological characteristics of pED.

14 8 2. Qualitative and quantitative synthesis (activation likelihood estimation meta-analysis)  
15 9 will both be used in this study.

16 10 3. A customized checklist is proposed to evaluate the quality of the included studies  
17 11 according to the purpose of this review.

18 12 4. This review does not restrict the race, age, disease conditions of participants or pre-  
19 13 processing procedures of included studies, which will increase the heterogeneity of  
20 14 included studies and may increase the risk of bias of the review.

21 15

22  
23  
24  
25  
26  
27  
28  
29  
30  
31  
32  
33 16 **INTRODUCTION**

34 17 Erectile dysfunction (ED) is the most common male sexual disorder. It is characterized  
35 18 by the persistent inability to attain or maintain an adequate erection to obtain  
36 19 satisfactory sexual intercourse regardless of the capability of ejaculation.<sup>1-3</sup> According  
37 20 to epidemiological studies, approximately 37% of men over 70 years old and 11% of  
38 21 men over 30 years old suffer from this sexual dysfunction.<sup>4</sup> As a physical and  
39 22 psychosocial illness, ED not only impairs male sexual confidence and satisfaction but  
40 23 also severely impacts the quality of life (QoL)<sup>5 6</sup> and relationships<sup>7</sup> of patients and their  
41 24 partners. More importantly, ED has been increasingly regarded as an independent risk  
42 25 factor for cardiovascular diseases.<sup>8 9</sup> According to its different causes<sup>10 11</sup>, ED is  
43 26 subdivided into psychogenic ED (pED), organic ED, and mixed ED. Different from  
44 27 organic ED, which has clear causes and pathological characteristics, pED is generally  
45 28 caused by uncertain psychological factors<sup>12 13</sup> and lacks specific biomarkers.

46  
47  
48  
49  
50  
51  
52  
53  
54  
55  
56  
57  
58 29 **Rationale for review**

1 Penile erection is a complex physiological process modulated by the central nervous  
2 system and mediated by several neurotransmitters and neuropeptides.<sup>14 15</sup> A meta-  
3 analysis identified that penile erection was regulated by several cerebral regions; the  
4 activities of the insular cortex, claustrum, putamen, and anterior midcingulate cortex  
5 were consistently positively correlated with male penile erection.<sup>16</sup> With the close  
6 relationship between the brain and penile erection being widely accepted, using  
7 neuroimaging techniques to explore the central pathological characteristics of pED has  
8 attracted the attention of many researchers.<sup>17-22</sup> In the process, some well-designed  
9 cognitive-behavioural models have been developed to further explain the  
10 neurobiological underpinning of abnormal behaviour in patients with ED.<sup>23 24</sup> For  
11 example, two task functional magnetic resonance imaging (fMRI) studies focusing on  
12 male sexual arousal reported that, when compared with healthy controls, patients with  
13 pED manifested lower penile tumescence, more activity in the left superior parietal lobe,  
14 ventromedial prefrontal cortex, and posterior cingulate cortex, and altered intrinsic  
15 functional connectivity of the default mode network and salience network during visual  
16 erotic stimuli.<sup>23 24</sup> Resting-state fMRI studies also suggested that patients with pED not  
17 only displayed aberrant spontaneous activities at the right anterior insula but also  
18 showed abnormal connection patterns between the right anterior insula and right  
19 dorsolateral prefrontal cortex as well as between the right anterior insula and right  
20 temporoparietal cortex. Furthermore, both the aberrant activities of the right anterior  
21 insula and the abnormal functional connection between the right anterior insula and  
22 right temporoparietal cortex were positively correlated with participant scores on the  
23 International Index of Erectile Function (IIEF) .<sup>25 26</sup> On structural MRI, researchers  
24 found that, when compared with healthy controls, pED sufferers presented grey matter  
25 atrophy in some subcortical structures, including the amygdala and nucleus accumbens,  
26 and the atrophied degree of left nucleus accumbens showed a close correlation with  
27 decreased erectile function.<sup>27</sup> Moreover, our previous study detected that patients with  
28 pED had significant microstructure alterations at the splenium of the corpus callosum  
29 and in multiple white matter regions.<sup>28</sup>

1  
2  
3  
4 1 Based on these neuroimaging studies, we may easily conclude that pED is not only a  
5 2 genitourinary disease but also is associated with abnormal alterations in both brain  
6 3 structure and brain function. However, there is no integrated study summarizing the  
7 4 scattered evidence of individual studies, and the central pathological alterations  
8 5 associated with pED remain unclear. Therefore, launching a rigorous systematic review  
9 6 to synthesize the hitherto existing studies is necessary to improve knowledge of the  
10 7 neurological underpinnings of pED and increase understanding of the role of the central  
11 8 nervous system in sexual activity.

### 9 **Objectives**

10 The objective of this systematic review is to integrate and assess the evidence of the  
11 11 impact of pED on the brain and to contribute a comprehensive summary of structural  
12 12 and functional brain alterations in patients with pED. This review also aims to  
13 13 synthesize correlations between the differences observed in some brain regions related  
14 14 to function or structure and the clinical characteristics of patients with pED, such as  
15 15 behavioural and psychophysiological data and data obtained from disease-related scales,  
16 16 QoL scales, and emotional scales.

### 17 **METHODS**

18 This protocol follows the Preferred Reporting Items for Systematic Reviews and Meta-  
19 19 Analysis Protocols (PRISMA-P) 2015 statement<sup>29</sup> and has been registered at the  
20 20 PROSPERO International Prospective Register of Systematic Reviews of the  
21 21 University of York (registration number CRD42019117206).

### 22 **Eligibility criteria**

23 The inclusion and exclusion criteria of studies will be described as follows.

#### 24 **Study types**

25 Case control studies, cohort studies, and randomized controlled trials will be included  
26 26 only if the original neuroimaging data can be extracted. Case reports, narrative or  
27 27 systematic reviews, meta-analyses, letters, and other second-hand studies will be  
28 28 excluded.

#### 29 **Study design**

1  
2  
3  
4 1 Neuroimaging studies centred on the differences between the brain structure, brain  
5 2 functional activity, and structural and functional connectivity of patients with pED and  
6 3 those of healthy controls will be included. Longitudinal studies focusing on the  
7 4 management of pED will be considered as long as the baseline neuroimaging data are  
8 5 reported. Both resting-state and task neuroimaging studies will be included, and no  
9 6 neuroimaging modality will be precluded. Any publication acquired data using  
10 7 multimodal neuroimaging techniques from the same participants will be collected  
11 8 separately in this review.<sup>30</sup>

### 19 9 Participants

20 10 Studies containing both patients with pED and parallel healthy controls will be  
21 11 considered for inclusion. The minimum sample size for inclusion will be restricted to  
22 12 12 participants per group, according to previous studies.<sup>30-32</sup> The race, age, and disease  
23 13 conditions (drug-naïve or drug-invented) of participants will not be restricted in this  
24 14 review.

### 31 15 Exposure

32 16 Patients with pED should be diagnosed by comprehensive history taking, physical  
33 17 examination, and even specific examinations according to the diagnostic guidelines of  
34 18 the European Association of Urology (EAU)<sup>33-35</sup>, the American Urological Association  
35 19 (AUA)<sup>36 37</sup>, or other authoritative organizations<sup>38</sup>. Patients with organic ED or mixed  
36 20 ED or with other andrological or cardiovascular complications will be excluded. Some  
37 21 studies enrolling patients without clear discrimination of subtypes of ED will be  
38 22 considered after comprehensive full-text assessment or contact with the authors to  
39 23 identify the participants as patients with pED.

### 48 24 Comparators

49 25 Participation of a parallel healthy control group in the study is required for inclusion in  
50 26 the current review. Healthy controls must have no prior diagnosis of ED at enrolment,  
51 27 and this must be verified by clinical examination during the study. Studies absenting  
52 28 from healthy controls will be excluded.

### 58 29 Outcome measures

1  
2  
3  
4 1 The primary outcomes of the included studies should be functional and structural brain  
5  
6 2 alterations of the patients with pED. Brain structure outcomes are related to white  
7  
8 3 matter microstructure, grey matter density or volume, or structural connectivity.  
9  
10 4 Outcomes related to brain function include whole-brain or region-of-interest functional  
11  
12 5 activity or functional connectivity (fMRI based on blood-oxygen-level-dependent  
13  
14 6 signal or cerebral blood flow), brain molecular metabolism (positron emission  
15  
16 7 tomography or single-photon emission computed tomography); neurochemical activity  
17  
18 8 (magnetic resonance spectroscopy); or brain electrical activity (electroencephalogram).  
19  
20 9 The secondary outcomes of these studies may contain behavioural and  
21  
22 10 psychophysiological data (such as genital responses and heart and respiratory rates<sup>23</sup>  
23  
24 11 <sup>24</sup>); symptom-related scales (such as IIEF-5<sup>39</sup>, Quality of Erection Questionnaire  
25  
26 12 (QEQ)<sup>40</sup>, and the Erection Hardness Score (EHS))<sup>41</sup>; QoL questionnaire (the Sexual  
27  
28 13 Life Quality Questionnaire (SLQQ))<sup>42</sup>; or psychological assessment scales (such as the  
29  
30 14 Self-Rating Anxiety Scale (SAS)<sup>43</sup>, the Self-Rating Depression Scale (SDS)<sup>44</sup>, and the  
31  
32 15 Brief Psychiatric Rating Scale (BPRS)<sup>45</sup>). Studies with only a primary outcome will  
33  
34 16 also be included in this review.

#### 35 17 Report characteristics

36  
37 18 Peer-reviewed original studies will be included. Conference proceedings and  
38  
39 19 unpublished theses will be excluded. Publication time will be restricted to prior to 1  
40  
41 20 October 2019 (the anticipated completion date of this review), and language will be  
42  
43 21 restricted to English and Chinese.

#### 44 22 **Searching strategy**

45  
46 23 Electronic searching will be conducted in PubMed, EMBASE, Web of Science, China  
47  
48 24 Biology Medicine Database, and China National Knowledge Infrastructure (CNKI)  
49  
50 25 using medical subject headings (MeSH) terms. The searching strategies of PubMed  
51  
52 26 (English) and CNKI (Chinese) are displayed in Table 1 and will be replicated for the  
53  
54 27 other electronic databases. Thereafter, the snowballing search strategy will be  
55  
56 28 employed to find other eligible studies according to the reference lists of enrolled  
57  
58 29 literature. In addition, the WHO International Clinical Trials Registry Platform will be  
59  
60

1 searched for potential results.

2 [Insert Table 1 here]

### 3 **Selection process**

4 Covidence (<https://www.covidence.org>), the Cochrane Library-recommended online  
5 systematic review management system, will be used to manage literature. The initial  
6 searching results obtained following the above strategies will be uploaded to Covidence.  
7 After duplicates are removed, TY will screen the title and abstract to remove the  
8 obviously irrelevant records. Then two reviewers (TY and JX) will complete the  
9 abstract and full-text review in parallel. Any disagreement between TY and JX will be  
10 reconsidered by a third reviewer (ZL). In order to assess the reliability of the selection  
11 criteria and inter-rater agreement between the two reviewers, Cohen's kappa will be  
12 calculated at the parallel selection stage; a kappa coefficient ( $k$ ) over 0.75 will indicate  
13 high reliability.<sup>46</sup> The record selection process will be reported using the PRISMA flow  
14 diagram<sup>47</sup> and elimination reasons for ineligible records will be reported in detail.

### 15 **Data collection**

16 The two independent reviewers (TY and JX) will doubly extract data using a standard  
17 data extraction spreadsheet in Excel. Again, any inconsistency between reviewers will  
18 be reconsidered and the result determined by ZL, the third reviewer.

19 The following information will be retrieved and extracted from each record.

- 20 ● Publication information: title, first author, publishing time, country or region,  
21 and funding support.
- 22 ● Details of methodology: participants, sample size, diagnostic criteria,  
23 demographic characteristics (including age, handedness, ethnicity, and  
24 education), imaging modalities, data analysis strategies, pED-related  
25 cognitive-behavioural models, and clinical outcomes.
- 26 ● Results: the significant altered cerebral regions (described by peak MNI  
27 /Talairach coordinate, cluster size, and statistical threshold); the value of  
28 clinical characteristics (behavioural and psychophysiological data, disease-  
29 related scales, QoL scales, emotional scales, etc.); and the correlations between

1  
2  
3  
4 1 imaging data and clinical data.

5  
6 2 Any missing information or questions about the above data will be settled by contacting  
7  
8 3 the authors. If no clarification is provided after 4 weeks, the study will be included in  
9  
10 4 the final analysis with the missing information marked.

### 11 5 **Outcomes and prioritization**

12  
13 6 The primary outcome of this review will be the significantly altered cerebral regions in  
14  
15 7 patients with pED when compared with healthy controls. Due to the variety of  
16  
17 8 analytical methods and great heterogeneity of the studies' statistical thresholds (e.g.,  
18  
19 9 voxel cluster size thresholds, statistical magnitudes, methods of correcting for multiple  
20  
21 10 comparisons), it is unrealistic to set a uniform significance threshold. Therefore, the  
22  
23 11 significance of results will be determined by the study authors' own criteria.<sup>48</sup> Some  
24  
25 12 neuroimaging studies also report results trending to significant or significant only  
26  
27 13 before correction.<sup>48</sup> For a more comprehensive view, these regions will be collected  
28  
29 14 with special symbols in the qualitative synthesis. The secondary outcome of this review  
30  
31 15 will be the associations between the altered cerebral structure and function and the  
32  
33 16 clinical characteristics, which mainly include behavioural and psychophysiological  
34  
35 17 data, disease-related scales, QoL scales, emotional scales, and so on. The values of  
36  
37 18 these clinical characteristics will be recorded and may be used to explain interstudy  
38  
39 19 variability when necessary.

### 40 20 **Quality assessment**

41  
42 21 There are no standardized criteria for quality assessment of neuroimaging studies.<sup>49-50</sup>  
43  
44 22 Authors of previous systematic reviews have always developed their own quality  
45  
46 23 assessment tools based on existing tools (such as QUADAS-2 and the Newcastle-  
47  
48 24 Ottawa Scale (NOS)).<sup>49-51-55</sup> However, because of the diverse study objectives, current  
49  
50 25 assessment tools are not suitable for this review. Therefore, after referring to the NOS<sup>56</sup>,  
51  
52 26 some published systematic reviews,<sup>49-51-57</sup> and the Committee on Best Practices in Data  
53  
54 27 Analysis and Sharing in Neuroimaging Using MRI<sup>58</sup>  
55  
56 28 (<http://www.humanbrainmapping.org>), a customized checklist is proposed for the  
57  
58 29 current review. This checklist will be used to evaluate the quality of the included studies  
59  
60

1 based on 9 items (Table 2). Each item is scored as 1 (Yes) or 0 (No or Don't know),  
2 and the summation of items generates an overall quality score (0–9 points). Each study's  
3 quality is defined as high (8–9 points), medium (5–7points), or low (0–4 points).

4 [Insert Table 2 here]

5 Quality assessment will be performed by a professional assessor (LL) who is  
6 experienced with quality assessment scoring and a nonprofessional assessor (RS) who  
7 has never engaged in quality assessment of systematic reviews. These two assessors  
8 will independently evaluate the enrolled studies based on the checklist; any discrepancy  
9 will be reconsidered by the third reviewer (ZL). Again, the inter-rater agreement will  
10 be assessed by Cohen's kappa with  $k > 0.75$  indicating high reliability.

### 11 **Data Synthesis**

12 The collected data, including publication information, methodologies, and significant  
13 study findings, will be summarized in a table. Methodologies and neuroimaging results  
14 will then be pooled and described in detail. The total and average sample size, age range  
15 of participants, and mean duration of patients of included studies will be calculated, and  
16 the cognitive-behavioural models, outcomes of behavioural and psychophysiological  
17 measurement, disease-related scales, QoL scales, and emotional scales will be  
18 summarized. A qualitative review will be performed to synthesize the structural and  
19 functional brain alterations and correlations between these alterations and the clinical  
20 characteristics of patients with pED. For more clear presentation, these findings will be  
21 integrated separately according to task or resting design and neuroimaging modality. If  
22 feasible (if 17 or more resting-state studies are included<sup>59</sup>), an activation likelihood  
23 estimation meta-analysis<sup>60 61</sup> will be launched to quantitatively synthesize the  
24 differences in cerebral structure and function between patients with pED and healthy  
25 controls. Subgroup analyses will not be performed in this review. The strength of  
26 evidence of this review will be determined by the checklist described above.

### 27 **CONCLUSION**

28 Although neuroimaging studies have verified the existence of structural and functional  
29 brain alterations in patients with pED, the scattered neuroimaging biomarkers of pED

1  
2  
3  
4 1 in individual studies have not yet been summarized. Therefore, this systematic review  
5 2 is launched, aiming to synthesize the central pathological characteristics and the  
6 3 associations between the altered cerebral structure and function and the clinical  
7 4 characteristics of pED. The current review will be the first to synthesize the  
8 5 neuroimaging evidence of pED in a systematic way, to include a meta-analysis of the  
9 6 findings, and to assess the quality of these neuroimaging studies. This work will provide  
10 7 a coherent synthesis of the recent neuroimaging studies on pED and improve  
11 8 knowledge of the neurological underpinnings of pED.

### 9 **Patient and public involvement**

10 This is a protocol for systematic review. No patients and public were involved.

### 11 **Ethics and dissemination**

12 Ethical approval is not required as primary data will not be collected. This review will  
13 be published in a peer-reviewed journal and presented at conferences.

### 14 **Contributors**

15 Peihai Zhang was responsible for this study. Tao Yin, Zhengjie Li and Peihai Zhang  
16 conceived and designed the study. Tao Yin, Zhengjie Li and Jing Xiong participated in  
17 drafting the protocol and preparing the manuscript. Lei Lan, Ruirui Sun and Feiqiang  
18 Ren provided feedback on the study design and protocol. All authors read and approved  
19 the final manuscript.

### 20 **Funding**

21 This work is financially supported by the National Natural Science Foundation of China  
22 (NO.81774137).

### 23 **Competing interests**

24 The authors declare that they have no competing interests.

### 25 **Patient consent**

26 Not required.

### 27 **Data sharing statement**

28 This paper does not include the original data.

### 29 **Reference**

- 1 1. Najari BB, Kashanian JA. Erectile Dysfunction. *Jama* 2016;**316**:1838. doi:  
2 10.1001/jama.2016.12284
- 3 2. Muneer A, Kalsi J, Nazareth I, *et al.* Erectile dysfunction. *Bmj* 2014;**348**:g129. doi:  
4 10.1136/bmj.g129
- 5 3. Montorsi F, Adakan G, Becher E, *et al.* Summary of the recommendations on sexual  
6 dysfunctions in men. *J Sex Med* 2010;**7**:3572-88. doi: 10.1111/j.1743-6109.2010.02062.x
- 7 4. Rosen RC, Fisher WA, Eardley I, *et al.* The multinational Men's Attitudes to Life Events and  
8 Sexuality (MALES) study: I. Prevalence of erectile dysfunction and related health concerns in  
9 the general population. *Curr Med Res Opin* 2004;**20**:607-17. doi:  
10 10.1185/030079904125003467
- 11 5. Li HJ, Bai WJ, Dai YT, *et al.* An analysis of treatment preferences and sexual quality of life  
12 outcomes in female partners of Chinese men with erectile dysfunction. *Asian J Androl*  
13 2016;**18**:773-9. doi: 10.4103/1008-682x.159719
- 14 6. Yafi FA, Jenkins L, Albersen M, *et al.* Erectile dysfunction. *Nat Rev Dis Primers* 2016;**2**:16003.  
15 doi: 10.1038/nrdp.2016.3
- 16 7. Boddi V, Corona G, Fisher AD, *et al.* "It takes two to tango": the relational domain in a cohort  
17 of subjects with erectile dysfunction (ED). *J Sex Med* 2012;**9**:3126-36. doi: 10.1111/j.1743-  
18 6109.2012.02948.x
- 19 8. Uddin SMI, Mirbolouk M, Dardari Z, *et al.* Erectile Dysfunction as an Independent Predictor  
20 of Future Cardiovascular Events: The Multi-Ethnic Study of Atherosclerosis. *Circulation* 2018  
21 doi: 10.1161/circulationaha.118.033990
- 22 9. Dong JY, Zhang YH, Qin LQ. Erectile dysfunction and risk of cardiovascular disease: meta-

- 1  
2  
3  
4 1 analysis of prospective cohort studies. *J Am Coll Cardiol* 2011;**58**:1378-85. doi:  
5  
6  
7 2 10.1016/j.jacc.2011.06.024  
8  
9 3 10. Glina S, Cohen DJ, Vieira M. Diagnosis of erectile dysfunction. *Curr Opin Psychiatry*  
10  
11 4 2014;**27**:394-9. doi: 10.1097/ycp.0000000000000097  
12  
13  
14 5 11. Shamloul R, Ghanem H. Erectile dysfunction. *Lancet* 2013;**381**:153-65. doi:  
15  
16 6 10.1016/s0140-6736(12)60520-0  
17  
18  
19 7 12. Rastrelli G, Maggi M. Erectile dysfunction in fit and healthy young men: psychological or  
20  
21 8 pathological? *Transl Androl Urol* 2017;**6**:79-90. doi: 10.21037/tau.2016.09.06  
22  
23  
24 9 13. Papagiannopoulos D, Khare N, Nehra A. Evaluation of young men with organic erectile  
25  
26 10 dysfunction. *Asian J Androl* 2015;**17**:11-6. doi: 10.4103/1008-682x.139253  
27  
28  
29 11 14. Courtois F, Carrier S, Charvier K, *et al.* The control of male sexual responses. *Curr Pharm*  
30  
31 12 *Des* 2013;**19**:4341-56. doi: 10.2174/13816128113199990333  
32  
33  
34 13 15. Argiolas A, Rosaria Melis M. Neuromodulation of penile erection: an overview of the role of  
35  
36 14 neurotransmitters and neuropeptides. *Prog Neurobiol* 1995;**47**:235-55. doi:  
37  
38 15 [https://doi.org/10.1016/0301-0082\(95\)80003-Q](https://doi.org/10.1016/0301-0082(95)80003-Q)  
39  
40  
41  
42 16 16. Poepl TB, Langguth B, Laird AR, *et al.* The functional neuroanatomy of male psychosexual  
43  
44 17 and physiosexual arousal: a quantitative meta-analysis. *Hum Brain Mapp* 2014;**35**:1404-21. doi:  
45  
46 18 10.1002/hbm.22262  
47  
48  
49 19 17. Chen J, Chen Y, Gao Q, *et al.* Impaired Prefrontal-Amygdala Pathway, Self-Reported  
50  
51 20 Emotion, and Erection in Psychogenic Erectile Dysfunction Patients With Normal Nocturnal  
52  
53 21 Erection. *Front Hum Neurosci* 2018;**12**:157. doi: 10.3389/fnhum.2018.00157  
54  
55  
56 22 18. Wu J, He Z, Chen X, *et al.* Altered brain networks in psychogenic erectile dysfunction: a  
57  
58  
59  
60

- 1 resting-state fMRI study. *Brain Imaging Behav* 2017;**5**:1073-81. doi: 10.1007/s11682-017-  
2 9805-910.1111/andr.12411  
3  
4 19. Winder K, Linker RA, Seifert F, *et al*. Insular multiple sclerosis lesions are associated with  
5  
6  
7  
8  
9  
10  
11  
12  
13  
14  
15  
16  
17  
18  
19  
20  
21  
22  
23  
24  
25  
26  
27  
28  
29  
30  
31  
32  
33  
34  
35  
36  
37  
38  
39  
40  
41  
42  
43  
44  
45  
46  
47  
48  
49  
50  
51  
52  
53  
54  
55  
56  
57  
58  
59  
60
20. Jin C, Guan M, Dong M. Aberrant baseline brain activity in psychogenic erectile dysfunction  
patients: a resting state fMRI study. *J Neurol* 2018;**12**:1393-404. doi: 10.1007/s00415-018-  
8763-510.1007/s11682-017-9805-9
21. Chen Y, Chen G, Dai Y, *et al*. Brain structural network topological alterations of the left  
prefrontal and limbic cortex in psychogenic erectile dysfunction. *Andrology* 2018;**128**:393-403.  
doi: 10.1111/andr.1241110.1080/00207454.2017.1387116
22. Wang T, Liu B, Wu ZJ, *et al*. Hypothalamus may be involved in psychogenic erectile  
dysfunction. *Zhonghua Nan Ke Xue* 2008;**14**:602-5. doi: 10.13263/j.cnki.nja.2008.07.007
23. Cera N, Di Pierro ED, Sepede G, *et al*. The role of left superior parietal lobe in male sexual  
behavior: dynamics of distinct components revealed by FMRI. *J Sex Med* 2012;**9**:1602-12. doi:  
10.1111/j.1743-6109.2012.02719.x
24. Cera N, Di Pierro ED, Ferretti A, *et al*. Brain networks during free viewing of complex erotic  
movie: new insights on psychogenic erectile dysfunction. *PLoS One* 2014;**9**:e105336. doi:  
10.1371/journal.pone.0105336
25. Jin C, Guan M, Dong M, *et al*. Aberrant baseline brain activity in psychogenic erectile  
dysfunction patients: a resting state fMRI study. *Brain Imaging and Behavior* 2018;**12**:1393-404.  
doi: 10.1007/s11682-017-9805-9
26. Wang Y, Dong M, Guan M, *et al*. Aberrant Insula-Centered Functional Connectivity in

- 1  
2  
3  
4 1 Psychogenic Erectile Dysfunction Patients: A Resting-State fMRI Study. *Front Hum Neurosci*  
5  
6 2017;**11**:221. doi: 10.3389/fnhum.2017.00221  
7  
8  
9 3 27. Cera N, Delli Pizzi S, Di Pierro ED, *et al.* Macrostructural alterations of subcortical grey  
10  
11 matter in psychogenic erectile dysfunction. *PLoS One* 2012;**7**:e39118. doi:  
12  
13 10.1371/journal.pone.0039118  
14  
15  
16 6 28. Zhang P, Liu J, Li G, *et al.* White matter microstructural changes in psychogenic erectile  
17  
18 dysfunction patients. *Andrology* 2014;**2**:379-85. doi: 10.1111/j.2047-2927.2014.00191.x  
19  
20  
21 7 29. Moher D, Shamseer L, Clarke M, *et al.* Preferred reporting items for systematic review and  
22  
23 meta-analysis protocols (PRISMA-P) 2015 statement. *Syst Rev* 2015;**4**:1. doi: 10.1186/2046-  
24  
25 9 4053-4-1  
26  
27  
28 10 30. Lees B, Mewton L, Stapinski L, *et al.* Binge drinking in young people: protocol for a  
29  
30 systematic review of neuropsychological, neurophysiological and neuroimaging studies. *BMJ*  
31  
32 *Open* 2018;**8**:e023629. doi: 10.1136/bmjopen-2018-023629  
33  
34  
35 13 31. Ewing SW, Sakhardande A, Blakemore SJ. The effect of alcohol consumption on the  
36  
37 adolescent brain: A systematic review of MRI and fMRI studies of alcohol-using youth.  
38  
39 *Neuroimage Clin* 2014;**5**:420-37. doi: 10.1016/j.nicl.2014.06.011  
40  
41  
42 16 32. Desmond JE, Glover GH. Estimating sample size in functional MRI (fMRI) neuroimaging  
43  
44 studies: statistical power analyses. *J Neurosci Methods* 2002;**118**:115-28. doi:  
45  
46 17 https://doi.org/10.1016/S0165-0270(02)00121-8  
47  
48  
49 18 33. Wespes E, Amar E, Hatzichristou D, *et al.* Guidelines on erectile dysfunction. *Eur Urol*  
50  
51 2002;**41**:1-5. doi: https://doi.org/10.1016/S0302-2838(01)00008-2  
52  
53  
54 20 34. Wespes E, Amar E, Hatzichristou D, *et al.* EAU Guidelines on erectile dysfunction: an  
55  
56  
57  
58  
59  
60

- 1  
2  
3  
4 1 update. *Eur Urol* 2006;**49**:806-15. doi: 10.1016/j.eururo.2006.01.028  
5  
6  
7 2 35. Hatzimouratidis K, Amar E, Eardley I, *et al.* Guidelines on male sexual dysfunction: erectile  
8  
9 3 dysfunction and premature ejaculation. *Eur Urol* 2010;**57**:804-14. doi:  
10  
11 4 10.1016/j.eururo.2010.02.020  
12  
13  
14 5 36. Montague DK, Jarow JP, Broderick GA, *et al.* Chapter 1: The management of erectile  
15  
16 6 dysfunction: an AUA update. *J Urol* 2005;**174**:230-9. doi: 10.1097/01.ju.0000164463.19239.19  
17  
18  
19 7 37. Burnett AL, Nehra A, Breau RH, *et al.* Erectile Dysfunction: AUA Guideline. *J Urol*  
20  
21 8 2018;**200**:633-41. doi: 10.1016/j.juro.2018.05.004  
22  
23  
24 9 38. Ryu JK, Cho KS, Kim SJ, *et al.* Korean Society for Sexual Medicine and Andrology (KSSMA)  
25  
26 10 Guideline on Erectile Dysfunction. *World J Mens Health* 2013;**31**:83-102. doi:  
27  
28 11 10.5534/wjmh.2013.31.2.83  
29  
30  
31 12 39. Rosen RC, Riley A, Wagner G, *et al.* The international index of erectile function (IIEF): a  
32  
33 13 multidimensional scale for assessment of erectile dysfunction. *Urology* 1997;**49**:822-30. doi:  
34  
35 14 [https://doi.org/10.1016/S0090-4295\(97\)00238-0](https://doi.org/10.1016/S0090-4295(97)00238-0)  
36  
37  
38 15 40. Porst H, Gilbert C, Collins S, *et al.* Development and validation of the quality of erection  
39  
40 16 questionnaire. *J Sex Med* 2007;**4**:372-81. doi: 10.1111/j.1743-6109.2006.00422.x  
41  
42  
43 17 41. Mulhall JP, Goldstein I, Bushmakin AG, *et al.* Validation of the erection hardness score. *J*  
44  
45 18 *Sex Med* 2007;**4**:1626-34. doi: 10.1111/j.1743-6109.2007.00600.x  
46  
47  
48 19 42. Woodward JM, Hass SL, Woodward PJ. Reliability and validity of the sexual life quality  
49  
50 20 questionnaire (SLQQ). *Qual Life Res* 2002;**11**:365-77. doi:  
51  
52 21 <https://doi.org/10.1023/A:1015513228469>  
53  
54  
55 22 43. Zung WW. A rating instrument for anxiety disorders. *Psychosomatics* 1971;**12**:371-9. doi:  
56  
57  
58  
59  
60

- 1  
2  
3  
4 1 10.1016/s0033-3182(71)71479-0  
5  
6 2 44. Zung WW. A SELF-RATING DEPRESSION SCALE. *Arch Gen Psychiatry* 1965;**12**:63-70.  
7  
8  
9 3 doi: doi:10.1001/archpsyc.1965.01720310065008  
10  
11 4 45. Overall JE, Gorham DR. The Brief Psychiatric Rating Scale. *Psychological Reports*  
12  
13 1962;**10**:799-812. doi: 10.2466/pr0.1962.10.3.799  
14  
15  
16 6 46. McHugh ML. Interrater reliability: the kappa statistic. *Biochem Med (Zagreb)* 2012;**22**:276-  
17  
18 7 82.  
19  
20 8 47. Moher D, Liberati A, Tetzlaff J, *et al*. Preferred reporting items for systematic reviews and  
21  
22 9 meta-analyses: the PRISMA statement. *PLoS Med* 2009;**6**:e1000097. doi:  
23  
24 10 10.1371/journal.pmed.1000097  
25  
26  
27 11 48. Fox KC, Nijeboer S, Dixon ML, *et al*. Is meditation associated with altered brain structure?  
28  
29 12 A systematic review and meta-analysis of morphometric neuroimaging in meditation  
30  
31 13 practitioners. *Neurosci Biobehav Rev* 2014;**43**:48-73. doi: 10.1016/j.neubiorev.2014.03.016  
32  
33  
34 14 49. Soiza RL, Sharma V, Ferguson K, *et al*. Neuroimaging studies of delirium: a systematic  
35  
36 15 review. *J Psychosom Res* 2008;**65**:239-48. doi: 10.1016/j.jpsychores.2008.05.021  
37  
38  
39 16 50. Haggstrom L, Welschinger R, Caplan GA. Functional neuroimaging offers insights into  
40  
41 17 delirium pathophysiology: A systematic review. *Australasian Journal on Ageing* 2017;**36**:186-  
42  
43 18 92. doi: 10.1111/ajag.12417.  
44  
45  
46 19 51. Lavagnino L, Arnone D, Cao B, *et al*. Inhibitory control in obesity and binge eating disorder:  
47  
48 20 A systematic review and meta-analysis of neurocognitive and neuroimaging studies. *Neurosci*  
49  
50 21 *Biobehav Rev* 2016;**68**:714-26. doi: 10.1016/j.neubiorev.2016.06.041  
51  
52  
53 22 52. Sumner PJ, Bell IH, Rossell SL. A systematic review of task-based functional neuroimaging  
54  
55  
56  
57  
58  
59  
60

- 1 studies investigating language, semantic and executive processes in thought disorder.  
2  
3  
4  
5  
6  
7 2 *Neurosci Biobehav Rev* 2018;**94**:59-75. doi: 10.1016/j.neubiorev.2018.08.005  
8  
9  
10 3 53. McCrea M, Meier T, Huber D, *et al.* Role of advanced neuroimaging, fluid biomarkers and  
11  
12 4 genetic testing in the assessment of sport-related concussion: a systematic review. *Br J Sports*  
13  
14 5 *Med* 2017;**51**:919-29. doi: 10.1136/bjsports-2016-097447  
15  
16  
17 6 54. Ailion AS, Hortman K, King TZ. Childhood Brain Tumors: a Systematic Review of the  
18  
19 7 Structural Neuroimaging Literature. *Neuropsychol Rev* 2017;**27**:220-44. doi: 10.1007/s11065-  
20  
21 8 017-9352-6  
22  
23  
24 9 55. Cagnie B, Coppieters I, Denecker S, *et al.* Central sensitization in fibromyalgia? A  
25  
26 10 systematic review on structural and functional brain MRI. *Semin Arthritis Rheum* 2014;**44**:68-  
27  
28 11 75. doi: 10.1016/j.semarthrit.2014.01.001  
29  
30  
31 12 56. Wells GA, Shea B, O'Connell D, *et al.* The Newcastle-Ottawa Scale (NOS) for assessing  
32  
33 13 the quality of nonrandomised studies in meta-analyses. Secondary The Newcastle-Ottawa  
34  
35 14 Scale (NOS) for assessing the quality of nonrandomised studies in meta-analyses 2013.  
36  
37 15 [http://www.ohri.ca/programs/clinical\\_epidemiology/oxford.asp](http://www.ohri.ca/programs/clinical_epidemiology/oxford.asp).  
38  
39  
40  
41 16 57. Wilson PH, Smits-Engelsman B, Caeyenberghs K, *et al.* Cognitive and neuroimaging  
42  
43 17 findings in developmental coordination disorder: new insights from a systematic review of  
44  
45 18 recent research. *Dev Med Child Neurol* 2017;**59**:1117-29. doi: 10.1111/dmcn.13530  
46  
47  
48  
49 19 58. Nichols TE, Das S, Eickhoff SB, *et al.* Best practices in data analysis and sharing in  
50  
51 20 neuroimaging using MRI. *Nature neuroscience* 2017;**20**:299-303. doi: 10.1038/nn.4500  
52  
53  
54  
55 21 59. Eickhoff SB, Nichols TE, Laird AR, *et al.* Behavior, sensitivity, and power of activation  
56  
57 22 likelihood estimation characterized by massive empirical simulation. *Neuroimage* 2016;**137**:70-  
58  
59  
60

1  
2  
3  
4 1 85. doi: 10.1016/j.neuroimage.2016.04.072  
5

6 2 60. Eickhoff SB, Laird AR, Grefkes C, *et al.* Coordinate-based activation likelihood estimation  
7  
8  
9 3 meta-analysis of neuroimaging data: a random-effects approach based on empirical estimates  
10  
11  
12 4 of spatial uncertainty. *Hum Brain Mapp* 2009;**30**:2907-26. doi: 10.1002/hbm.20718  
13

14 5 61. Turkeltaub PE, Eden GF, Jones KM, *et al.* Meta-analysis of the functional neuroanatomy of  
15  
16  
17 6 single-word reading: method and validation. *Neuroimage* 2002;**16**:765-80. doi:  
18  
19  
20 7 doi.org/10.1006/nimg.2002.1131  
21

22 8

23  
24 9  
25  
26  
27  
28  
29  
30  
31  
32  
33  
34  
35  
36  
37  
38  
39  
40  
41  
42  
43  
44  
45  
46  
47  
48  
49  
50  
51  
52  
53  
54  
55  
56  
57  
58  
59  
60

1 Table 1: Searching items for identifying articles in PubMed (English) and CNKI (Chinese).

| PubMed searching strategy                   | CNKI searching strategy                   |
|---------------------------------------------|-------------------------------------------|
| #1 Erectile Dysfunction [MeSH Terms]        | #1 阳痿 [主题词]                               |
| #2 Impoten* [All Fields]                    | #2 勃起功能障碍 [主题词]                           |
| #3 Erectile disturbance [All Fields]        | #3 性功能障碍 [主题词]                            |
| #4 Erectile disorder [All Fields]           | #4 ED [主题词]                               |
| #5 Sexual Dysfunction [MeSH Terms]          | #5 #1 OR #2 OR#3 OR #4                    |
| #6 Asynodia [All Fields]                    | #6 神经影像学 [主题词]                            |
| #7 Erection failure [All Fields]            | #7 功能磁共振 [主题词]                            |
| #8 Penile Erection [MeSH Terms]             | #8 磁共振成像 [主题词]                            |
| #9 #1 OR #2 OR#3 OR #4 OR #5 OR #6 OR #7    | #9 MRI [主题词]                              |
| OR #8                                       | #10 PET [主题词]                             |
| #10 Neuroimaging [MeSH Terms]               | #11 SPECT [主题词]                           |
| #11 Functional Neuroimaging [MeSH Terms]    | #12 EEG [主题词]                             |
| #12 Brain imaging [All Fields]              | #13 MRS [主题词]                             |
| #13 Magnetic resonance imaging [MeSH Terms] | #14 DTI [主题词]                             |
| #14 Magnetic resonance* [MeSH Terms]        | #15 #6 OR #7 OR #8 OR #9 OR #10           |
| #15 MRI [All Fields]                        | OR#11 OR #12 OR #13 OR #14                |
| #16 Tomography [MeSH Terms]                 | <b>#16 Final search terms: #5 AND #15</b> |
| #17 Positron Emission Tomography [MeSH      |                                           |
| Terms]                                      |                                           |
| #18 Tomography, Emission-Computed, Single-  |                                           |
| Photon [MeSH Terms]                         |                                           |
| #19 PET [All Fields]                        |                                           |
| #20 PET-CT [All Fields]                     |                                           |
| #21 Single Photon Emission Computed         |                                           |
| Tomography [MeSH Terms]                     |                                           |
| #22 SPECT[All Fields]                       |                                           |
| #23 Electroencephalography [MeSH Terms]     |                                           |
| #24 EEG [All Fields]                        |                                           |
| #25 Magnetic Resonance Spectroscopy [MeSH   |                                           |
| Terms]                                      |                                           |
| #26 MRS [All Fields]                        |                                           |
| #27 Diffusion Tensor Imaging [MeSH Terms]   |                                           |
| #28 DTI [All Fields]                        |                                           |
| #29 #10 OR#11 OR #12 OR #13 OR #14 OR #15   |                                           |
| OR #16 OR #17 OR #18 OR #19 OR #20 OR #21   |                                           |
| OR #22 OR #23 OR #24 OR #25 OR #26 OR #27   |                                           |
| OR #28                                      |                                           |
| <b>#30 Final search terms: #9 AND #29</b>   |                                           |

2

3

1 Table 2. The checklist of quality assessment.

| Quality assessment categories                                                                                                           | yes | No | Don't know |
|-----------------------------------------------------------------------------------------------------------------------------------------|-----|----|------------|
| 1. The study addressed an explicit question (theory-driven).                                                                            |     |    |            |
| 2. With sufficient sample size or used justified power calculation.                                                                     |     |    |            |
| 3. With clearly inclusion criteria and exclusion criteria of participants.                                                              |     |    |            |
| 4. Controlled the important confounding factors such as age, handedness, and education of participants.                                 |     |    |            |
| 5. With adequate quality control during data acquisition.                                                                               |     |    |            |
| 6. Described the response rate in detail.                                                                                               |     |    |            |
| 7. Assessed outcomes with blinded or third-party assessors.                                                                             |     |    |            |
| 8. Used appropriate multiple testing correction in statistical modelling and inference.                                                 |     |    |            |
| 9. Reported detailed imaging results including MNI/Talairach coordinate, statistic magnitudes cluster sizes, and statistical threshold. |     |    |            |

2

3

**PRISMA-P (Preferred Reporting Items for Systematic review and Meta-Analysis Protocols) 2015 checklist: recommended items to address in a systematic review protocol\***

| Section and topic                 | Item No | Checklist item                                                                                                                                                                                  |                  |
|-----------------------------------|---------|-------------------------------------------------------------------------------------------------------------------------------------------------------------------------------------------------|------------------|
| <b>ADMINISTRATIVE INFORMATION</b> |         |                                                                                                                                                                                                 |                  |
| Title:                            |         |                                                                                                                                                                                                 |                  |
| Identification                    | 1a      | Identify the report as a protocol of a systematic review                                                                                                                                        | Line 3, Page 1   |
| Update                            | 1b      | If the protocol is for an update of a previous systematic review, identify as such                                                                                                              |                  |
| Registration                      | 2       | If registered, provide the name of the registry (such as PROSPERO) and registration number                                                                                                      | Line 29, Page 2  |
| Authors:                          |         |                                                                                                                                                                                                 |                  |
| Contact                           | 3a      | Provide name, institutional affiliation, e-mail address of all protocol authors; provide physical mailing address of corresponding author                                                       | Page 1           |
| Contributions                     | 3b      | Describe contributions of protocol authors and identify the guarantor of the review                                                                                                             | Line 13, Page 11 |
| Amendments                        | 4       | If the protocol represents an amendment of a previously completed or published protocol, identify as such and list changes; otherwise, state plan for documenting important protocol amendments | Not applicable   |
| Support:                          |         |                                                                                                                                                                                                 |                  |
| Sources                           | 5a      | Indicate sources of financial or other support for the review                                                                                                                                   | Line 20, Page 11 |
| Sponsor                           | 5b      | Provide name for the review funder and/or sponsor                                                                                                                                               | Line 20, Page 11 |
| Role of sponsor or funder         | 5c      | Describe roles of funder(s), sponsor(s), and/or institution(s), if any, in developing the protocol                                                                                              | Line 20, Page 11 |
| <b>INTRODUCTION</b>               |         |                                                                                                                                                                                                 |                  |
| Rationale                         | 6       | Describe the rationale for the review in the context of what is already known                                                                                                                   | Line 28, Page 3  |
| Objectives                        | 7       | Provide an explicit statement of the question(s) the review will address with reference to participants, interventions, comparators, and outcomes (PICO)                                        | Line 8, Page 5   |
| <b>METHODS</b>                    |         |                                                                                                                                                                                                 |                  |
| Eligibility criteria              | 8       | Specify the study characteristics (such as PICO, study design, setting, time frame) and report                                                                                                  | Line 21, Page 5  |

|                                    |     |                                                                                                                                                                                                                                                  |                  |
|------------------------------------|-----|--------------------------------------------------------------------------------------------------------------------------------------------------------------------------------------------------------------------------------------------------|------------------|
|                                    |     | characteristics (such as years considered, language, publication status) to be used as criteria for eligibility for the review                                                                                                                   |                  |
| Information sources                | 9   | Describe all intended information sources (such as electronic databases, contact with study authors, trial registers or other grey literature sources) with planned dates of coverage                                                            | Line 21, Page 7  |
| Search strategy                    | 10  | Present draft of search strategy to be used for at least one electronic database, including planned limits, such that it could be repeated                                                                                                       | Table 1, Page 16 |
| Study records:                     |     |                                                                                                                                                                                                                                                  |                  |
| Data management                    | 11a | Describe the mechanism(s) that will be used to manage records and data throughout the review                                                                                                                                                     | Line 4, Page 8   |
| Selection process                  | 11b | State the process that will be used for selecting studies (such as two independent reviewers) through each phase of the review (that is, screening, eligibility and inclusion in meta-analysis)                                                  | Line 2, Page 8   |
| Data collection process            | 11c | Describe planned method of extracting data from reports (such as piloting forms, done independently, in duplicate), any processes for obtaining and confirming data from investigators                                                           | Line 14, Page 8  |
| Data items                         | 12  | List and define all variables for which data will be sought (such as PICO items, funding sources), any pre-planned data assumptions and simplifications                                                                                          | Line 18, Page 8  |
| Outcomes and prioritization        | 13  | List and define all outcomes for which data will be sought, including prioritization of main and additional outcomes, with rationale                                                                                                             | Line 4, Page 9   |
| Risk of bias in individual studies | 14  | Describe anticipated methods for assessing risk of bias of individual studies, including whether this will be done at the outcome or study level, or both; state how this information will be used in data synthesis                             | Not applicable   |
| Data synthesis                     | 15a | Describe criteria under which study data will be quantitatively synthesised                                                                                                                                                                      | Line 10, Page 10 |
|                                    | 15b | If data are appropriate for quantitative synthesis, describe planned summary measures, methods of handling data and methods of combining data from studies, including any planned exploration of consistency (such as $I^2$ , Kendall's $\tau$ ) | Line 10, Page 10 |
|                                    | 15c | Describe any proposed additional analyses (such as sensitivity or subgroup analyses, meta-regression)                                                                                                                                            | Line 24, Page 10 |
|                                    | 15d | If quantitative synthesis is not appropriate, describe the type of summary planned                                                                                                                                                               | Line 21, Page 10 |
| Meta-bias(es)                      | 16  | Specify any planned assessment of meta-bias(es) (such as publication bias across studies, selective                                                                                                                                              | Not applicable   |

---

reporting within studies)

---

Confidence in cumulative  
evidence

17

Describe how the strength of the body of evidence will be assessed (such as GRADE)

Line 19, Page 9

---

**\* It is strongly recommended that this checklist be read in conjunction with the PRISMA-P Explanation and Elaboration (cite when available) for important clarification on the items. Amendments to a review protocol should be tracked and dated. The copyright for PRISMA-P (including checklist) is held by the PRISMA-P Group and is distributed under a Creative Commons Attribution Licence 4.0.**

*From: Shamseer L, Moher D, Clarke M, Ghersi D, Liberati A, Petticrew M, Shekelle P, Stewart L, PRISMA-P Group. Preferred reporting items for systematic review and meta-analysis protocols (PRISMA-P) 2015: elaboration and explanation. BMJ. 2015 Jan 2;349(jan02 1):g7647.*
